# Supplementary material for: A single photoreceptor splits perception and entrainment by cotransmission
Source: PubMed Central journal article supplement (PMC10651484; doi:10.1038/s41586-023-06681-6), 2023-10-25
Supplement: 41586_2023_6681_MOESM1_ESM.pdf [file 41586_2023_6681_MOESM1_ESM.pdf]

---

**Supplementary information**

---

**A single photoreceptor splits perception  
and entrainment by cotransmission**

---

In the format provided by the  
authors and unedited

## A single photoreceptor splits perception and entrainment by cotransmission

Na Xiao<sup>1,2,3,4,5,11</sup>, Shuang Xu<sup>1,2,3,4,11</sup>, Ze-Kai Li<sup>1,2,3,4,11</sup>, Min Tang<sup>1,2,3,4,9</sup>, Renbo Mao<sup>1,2</sup>, Tian Yang<sup>1,2,3,4</sup>, Si-Xing Ma<sup>1,2,3,4</sup>, Peng-Hao Wang<sup>1,2,3,4</sup>, Meng-Tong Li<sup>1,2,3,4,10</sup>, Ajay Sunilkumar<sup>6</sup>, François Rouyer<sup>6</sup>, Li-Hui Cao<sup>7</sup> & Dong-Gen Luo<sup>1,2,3,4,5,8</sup> ✉

### Affiliations:

<sup>1</sup>State Key Laboratory of Membrane Biology, School of Life Sciences, Peking University, Beijing, China.

<sup>2</sup>IDG/McGovern Institute for Brain Research, Peking University, Beijing, China.

<sup>3</sup>Peking-Tsinghua Center for Life Sciences, Academy for Advanced Interdisciplinary Studies, Peking University, Beijing, China.

<sup>4</sup>School of Life Sciences, Peking University, Beijing, China.

<sup>5</sup>Center for Quantitative Biology, Academy for Advanced Interdisciplinary Studies, Peking University, Beijing, China.

<sup>6</sup>Institut des Neurosciences Paris-Saclay, Université Paris-Sud, Université Paris-Saclay, CNRS, Gif-sur-Yvette, France.

<sup>7</sup>School of Basic Medical Sciences, Beijing Key Laboratory of Neural Regeneration and Repair, Capital Medical University, Beijing, China.

<sup>8</sup>Chinese Institute for Brain Research, Beijing, China.

<sup>9</sup>Present address: Department of Psychiatry, University of Texas Southwestern Medical Center, Dallas, TX, USA.

<sup>10</sup>Present address: Zuckerman Mind Brain and Behavior Institute, Columbia University, New York, NY, USA.

<sup>11</sup>These authors contributed equally: Na Xiao, Shuang Xu, Ze-Kai Li.

\*Correspondence: [dgluo@pku.edu.cn](mailto:dgluo@pku.edu.cn)

## Table of contents

|                                                              |    |
|--------------------------------------------------------------|----|
| Supplementary Table 1   Fly genotypes.....                   | 3  |
| Supplementary Table 2   Statistical details .....            | 10 |
| Supplementary Table 3   Fly strains used in this paper ..... | 20 |

**Supplementary Tables**  
**Supplementary Table 1 | Fly genotypes**

| Figures | Fly genotypes                                                                                                                                                                                                                                                                                                                                                                                                                                                                                                                                                                                                                                                                                                                                                                                                                       | Notes                                                                                                                                                                                                                                                                                                                                                                                                                                                                    |
|---------|-------------------------------------------------------------------------------------------------------------------------------------------------------------------------------------------------------------------------------------------------------------------------------------------------------------------------------------------------------------------------------------------------------------------------------------------------------------------------------------------------------------------------------------------------------------------------------------------------------------------------------------------------------------------------------------------------------------------------------------------------------------------------------------------------------------------------------------|--------------------------------------------------------------------------------------------------------------------------------------------------------------------------------------------------------------------------------------------------------------------------------------------------------------------------------------------------------------------------------------------------------------------------------------------------------------------------|
| Fig. 1a | <i>DvPdf-Gal4,UAS-GFP</i>                                                                                                                                                                                                                                                                                                                                                                                                                                                                                                                                                                                                                                                                                                                                                                                                           | Labeling clock neurons (l-LNV, s-LNV, 5 <sup>th</sup> s-LNV, ITP-LNd, and cry-negative LNd)                                                                                                                                                                                                                                                                                                                                                                              |
| Fig. 1b | <i>DvPdf-Gal4,UAS-GFP</i><br><i>Hdc<sup>JK910</sup>; DvPdf-LexA, LexAop-GFP</i><br><i>DvPdf-Gal4,UAS-GFP; HisC11<sup>134</sup>, ort<sup>1</sup></i>                                                                                                                                                                                                                                                                                                                                                                                                                                                                                                                                                                                                                                                                                 | Labeling clock neurons in WT, <i>Hdc<sup>JK910</sup></i> , or <i>HO</i> flies<br><i>Hdc<sup>JK910</sup></i> : histamine synthetase mutant<br><i>HO</i> : histamine receptors <i>HisC11</i> and <i>ort</i> double mutants                                                                                                                                                                                                                                                 |
| Fig. 1c | <i>DvPdf-Gal4,UAS-GFP; HisC11<sup>134</sup>, ort<sup>1</sup></i><br><i>norpA<sup>P41</sup>/y; DvPdf-Gal4,UAS-GFP;</i><br><i>HisC11<sup>134</sup>, ort<sup>1</sup></i><br><i>DvPdf-Gal4,UAS-GFP/Rh6-hid,rpr;</i><br><i>HisC11<sup>134</sup>, ort<sup>1</sup></i><br><i>DvPdf-Gal4,UAS-GFP/Rh6-Gal4,UAS-GFP;</i><br><i>HisC11<sup>134</sup>, ort<sup>1</sup></i>                                                                                                                                                                                                                                                                                                                                                                                                                                                                      | Labeling clock neurons in <i>HO</i> , or <i>norpA<sup>P41</sup></i> and <i>HO</i> flies<br><i>norpA<sup>P41</sup></i> : mutant of PLC, which is essential for phototransduction in <i>Drosophila</i><br>Labeling clock neurons in <i>HO</i> flies (with H-B eyelets genetically ablated or laser-ablated)<br><i>hid</i> and <i>rpr</i> : head involution defective and reaper, causing caspase-dependent apoptosis                                                       |
| Fig. 1d | <i>norpA<sup>P41</sup>/y; UAS-norpA/DvPdf-LexA, LexAop-GFP; HisC11<sup>134</sup>, ort<sup>1</sup></i><br><i>norpA<sup>P41</sup>/y; Rh1-Gal4,UAS-norpA/DvPdf-LexA, LexAop-GFP; HisC11<sup>134</sup>, ort<sup>1</sup></i><br><i>norpA<sup>P41</sup>/y; Rh3-Gal4,UAS-norpA/DvPdf-LexA, LexAop-GFP; HisC11<sup>134</sup>, ort<sup>1</sup></i><br><i>norpA<sup>P41</sup>/y; Rh4-Gal4,UAS-norpA/DvPdf-LexA, LexAop-GFP; HisC11<sup>134</sup>, ort<sup>1</sup></i><br><i>norpA<sup>P41</sup>/y; Rh5-Gal4,UAS-norpA/DvPdf-LexA, LexAop-GFP; HisC11<sup>134</sup>, ort<sup>1</sup></i><br><i>norpA<sup>P41</sup>/y; Rh6-Gal4,UAS-norpA/DvPdf-LexA, LexAop-GFP; HisC11<sup>134</sup>, ort<sup>1</sup></i>                                                                                                                                     | Labeling clock neurons in <i>norpA<sup>P41</sup></i> and <i>HO</i> triple mutant flies with <i>norpA</i> rescued in different photoreceptors (with H-B eyelets laser-ablated)                                                                                                                                                                                                                                                                                            |
| Fig. 1e | <i>DvPdf-Gal4,UAS-GFP; HisC11<sup>134</sup>, ort<sup>1</sup></i><br><i>DvPdf-Gal4,UAS-GFP; ninaE<sup>117</sup>, HisC11<sup>134</sup>, ort<sup>1</sup></i><br><i>Rh5<sup>2</sup>, DvPdf-Gal4,UAS-GFP; HisC11<sup>134</sup>, ort<sup>1</sup></i><br><i>DvPdf-Gal4,UAS-GFP; Rh6<sup>1</sup>, HisC11<sup>134</sup>, ort<sup>1</sup></i><br><i>Rh5<sup>2</sup>, DvPdf-Gal4,UAS-GFP; Rh6<sup>1</sup>, HisC11<sup>134</sup>, ort<sup>1</sup></i><br><i>norpA<sup>P41</sup>/y; Rh5-Gal4,UAS-norpA/DvPdf-LexA, LexAop-GFP</i><br><i>norpA<sup>P41</sup>/y; Rh5-Gal4,UAS-norpA/DvPdf-LexA, LexAop-GFP; HisC11<sup>134</sup>, ort<sup>1</sup></i><br><i>norpA<sup>P41</sup>/y; Rh6-Gal4,UAS-norpA/DvPdf-LexA, LexAop-GFP</i><br><i>norpA<sup>P41</sup>/y; Rh6-Gal4,UAS-norpA/DvPdf-LexA, LexAop-GFP; HisC11<sup>134</sup>, ort<sup>1</sup></i> | Labeling clock neurons in <i>HO</i> flies with loss of Rh1, Rh5, or Rh6 (with H-B eyelets laser-ablated)<br><i>ninaE<sup>117</sup></i> : Rhodopsin 1 mutant<br><i>Rh5<sup>2</sup></i> : Rhodopsin 5 mutant<br><i>Rh6<sup>1</sup></i> : Rhodopsin 6 mutant<br>Labeling clock neurons in <i>norpA<sup>P41</sup></i> or <i>norpA<sup>P41</sup></i> and <i>HO</i> triple mutant flies with <i>norpA</i> rescued in different photoreceptors (with H-B eyelets laser-ablated) |
| Fig. 2a | <i>Rh5-Gal4, Rh6-Gal4/UAS-FRT-STOP-FRT-GFP;</i><br><i>ChAT-FLP/+</i>                                                                                                                                                                                                                                                                                                                                                                                                                                                                                                                                                                                                                                                                                                                                                                | Labeling ChAT-expressing R8s<br>ChAT: Choline acetyltransferase, which catalyzes biosynthesis of acetylcholine and is considered as a specific marker for cholinergic neurons<br>FLP/FRT: FLP recombinase can recognize FRT site and catalyze the removal of DNA segments between two FRT sites                                                                                                                                                                          |
| Fig. 2b | <i>Rh5-Gal4/UAS-FRT-STOP-FRT-GFP; ChAT-FLP/+</i><br><i>Rh6-Gal4/UAS-FRT-STOP-FRT-GFP; ChAT-FLP/+</i>                                                                                                                                                                                                                                                                                                                                                                                                                                                                                                                                                                                                                                                                                                                                | Labeling ChAT-expressing R8s                                                                                                                                                                                                                                                                                                                                                                                                                                             |
| Fig. 2c | <i>Rh5-Gal4/UAS-FLP; VAcHT-FRT-STOP-FRT-HA/+</i><br><i>Rh6-Gal4/UAS-FLP; VAcHT-FRT-STOP-FRT-HA/+</i>                                                                                                                                                                                                                                                                                                                                                                                                                                                                                                                                                                                                                                                                                                                                | HA labeling in ChAT-expressing R8s<br>VAcHT: vesicular ACh transporter                                                                                                                                                                                                                                                                                                                                                                                                   |
| Fig. 2d | <i>Rh5-Gal4; UAS-FRT-STOP-FRT-GFP, ChAT-FLP/+</i>                                                                                                                                                                                                                                                                                                                                                                                                                                                                                                                                                                                                                                                                                                                                                                                   | HA labeling in ChAT-expressing R8s                                                                                                                                                                                                                                                                                                                                                                                                                                       |

|         |                                                                                                                                                                                                                                                                                                                                                                                                                                                                               |                                                                                                                                                                                                                                                                                         |
|---------|-------------------------------------------------------------------------------------------------------------------------------------------------------------------------------------------------------------------------------------------------------------------------------------------------------------------------------------------------------------------------------------------------------------------------------------------------------------------------------|-----------------------------------------------------------------------------------------------------------------------------------------------------------------------------------------------------------------------------------------------------------------------------------------|
|         | <i>Rh6-Gal4; UAS-FRT-STOP-FRT-GFP,ChAT-FLP/+</i>                                                                                                                                                                                                                                                                                                                                                                                                                              |                                                                                                                                                                                                                                                                                         |
| Fig. 2e | <i>Rh5-Gal4,Rh6-Gal4; UAS-norpA<br/>norpA<sup>P41</sup>/y</i>                                                                                                                                                                                                                                                                                                                                                                                                                 | norpA rescue in R8s of <i>norpA<sup>P41</sup></i> flies                                                                                                                                                                                                                                 |
| Fig. 2f | <i>norpA<sup>P41</sup>/y; Rh5-Gal4,Rh6-Gal4; UAS-norpA<br/>norpA<sup>P41</sup>; cry<sup>02</sup><br/>norpA<sup>P41</sup>/y; Rh5-Gal4,Rh6-Gal4,UAS-norpA;<br/>cry<sup>02</sup></i>                                                                                                                                                                                                                                                                                             | norpA rescue in R8s of <i>norpA<sup>P41</sup></i> and <i>cry<sup>02</sup></i> double mutant flies                                                                                                                                                                                       |
| Fig. 2g | <i>norpA<sup>P41</sup>/y; Rh5-Gal4,Rh6-Gal4,UAS-<br/>norpA/Rh6-hid,rpr; cry<sup>02</sup></i>                                                                                                                                                                                                                                                                                                                                                                                  | norpA rescue in R8s of <i>norpA<sup>P41</sup></i> and <i>cry<sup>02</sup></i> double mutant flies (with H-B eyelets ablated genetically)                                                                                                                                                |
| Fig. 2g | <i>ort<sup>1</sup><br/>norpA<sup>P41</sup>/y; Rh5-Gal4,Rh6-Gal4,UAS-norpA; ort<sup>1</sup></i>                                                                                                                                                                                                                                                                                                                                                                                | <i>ort<sup>1</sup></i> mutant flies<br>norpA rescue in R8s of <i>norpA<sup>P41</sup></i> and <i>ort<sup>1</sup></i> double mutant flies                                                                                                                                                 |
| Fig. 2h | <i>norpA<sup>P41</sup>/y; Rh5-Gal4,Rh6-Gal4,UAS-norpA;<br/>cry<sup>02</sup>,ort<sup>1</sup></i>                                                                                                                                                                                                                                                                                                                                                                               | Hdc knockout in R8s of flies with <i>norpA</i> rescued in R8s of <i>norpA<sup>P41</sup></i> flies<br>Cas9 and sgRNA: conditional gene knockout through CRISPR/Cas9                                                                                                                      |
| Fig. 2i | <i>norpA<sup>P41</sup>/y; Rh5-Gal4,Rh6-Gal4,UAS-<br/>norpA/UAS-ChAT-sgRNA,UAS-Cas9.P2;<br/>ort<sup>1</sup>,cry<sup>02</sup></i>                                                                                                                                                                                                                                                                                                                                               | norpA rescue in R8s of <i>norpA<sup>P41</sup></i> , <i>ort<sup>1</sup></i> , and <i>cry<sup>02</sup></i> triple mutant flies<br>ChAT knockout in R8s with <i>norpA</i> rescued in <i>norpA<sup>P41</sup></i> , <i>ort<sup>1</sup></i> , and <i>cry<sup>02</sup></i> triple mutant flies |
| Fig. 2j | <i>norpA<sup>P41</sup>/y; Rh5-Gal4,Rh6-Gal4,UAS-<br/>norpA/UAS-Cas9.P2,UAS-ChAT-sgRNA</i>                                                                                                                                                                                                                                                                                                                                                                                     | ChAT knockout in R8s with <i>norpA</i> rescued in <i>norpA<sup>P41</sup></i> flies                                                                                                                                                                                                      |
| Fig. 3a | <i>UAS-GFP,QUAS-tdTomato/+; Rh5-Gal4/trans-<br/>Tango; ort-QS/+</i>                                                                                                                                                                                                                                                                                                                                                                                                           | Exclusion of QUAS-tdTomato expression in <i>ort</i> -expressing postsynaptic neurons of pR8s by <i>ort-QS</i>                                                                                                                                                                           |
| Fig. 3a | <i>UAS-GFP,QUAS-tdTomato/+; Rh6-Gal4/trans-<br/>Tango; ort-QS/+</i>                                                                                                                                                                                                                                                                                                                                                                                                           | Exclusion of QUAS-tdTomato expression in <i>ort</i> -expressing postsynaptic neurons of yR8s by <i>ort-QS</i>                                                                                                                                                                           |
| Fig. 3b | <i>UAS-GFP,QUAS-tdTomato/+; VT037867-<br/>LexA,LexAop-GFP,Rh5-Gal4/ trans-Tango; ort-<br/>QS/+</i>                                                                                                                                                                                                                                                                                                                                                                            | AMA neurons overlap with postsynaptic neurons of pR8s                                                                                                                                                                                                                                   |
| Fig. 3b | <i>UAS-GFP,QUAS-tdTomato/+; VT037867-<br/>LexA,LexAop-GFP/trans-Tango; Rh6-Gal4/ort-<br/>QS</i>                                                                                                                                                                                                                                                                                                                                                                               | AMA neurons overlap with postsynaptic neurons of yR8s                                                                                                                                                                                                                                   |
| Fig. 3c | <i>Rh5-Gal4/VT037867-LexA; UAS-GFP<sup>1-<br/>10</sup>,LexAop-GFP<sup>11</sup>/+<br/>Rh6-LexA/+; UAS-GFP<sup>1-10</sup>,LexAop-<br/>GFP<sup>11</sup>/VT037867-Gal4<br/>GMR-LexA/+; UAS-GFP<sup>1-10</sup>,LexAop-<br/>GFP<sup>11</sup>/VT037867-Gal4</i>                                                                                                                                                                                                                      | GRASP between AMA neurons and pR8s, yR8s, or eye photoreceptors<br>GRASP: GFP Reconstitution Across Synaptic Partner                                                                                                                                                                    |
| Fig. 3d | <i>VT037867-Gal4,UAS-GCaMP6m<br/>Rh5<sup>2</sup>; VT037867-Gal4,UAS-GCaMP6m,Rh6<sup>1</sup><br/>norpA<sup>P41</sup>/y; Rh5-Gal4,Rh6-Gal4/+; VT037867-<br/>Gal4,UAS-GCaMP6m/UAS-norpA</i>                                                                                                                                                                                                                                                                                      | Labeling AMA neurons in WT, or <i>Rh5<sup>2</sup>;Rh6<sup>1</sup></i> mutant flies, or <i>norpA<sup>P41</sup></i> flies with <i>norpA</i> rescued in R8s                                                                                                                                |
| Fig. 3e | <i>VT037867-Gal4,UAS-GCaMP6m<br/>Rh5<sup>2</sup>; VT037867-Gal4,UAS-GCaMP6m,Rh6<sup>1</sup><br/>norpA<sup>P41</sup>/y; Rh5-Gal4,Rh6-Gal4/+; VT037867-<br/>Gal4,UAS-GCaMP6m/UAS-norpA<br/>Hdc<sup>JK910</sup>; VT037867-Gal4,UAS-GCaMP6m<br/>VT037867-Gal4,UAS-GCaMP6m,HisCl<sup>134</sup>,ort<sup>1</sup><br/>Rh5-Gal4,Rh6-Gal4,UAS-Cas9.P2/UAS-ChAT<br/>sgRNA; VT037867-Gal4,UAS-GCaMP6m<br/>Rh5-Gal4,Rh6-Gal4,UAS-Cas9.P2/UAS-VChT<br/>sgRNA; VT037867-Gal4,UAS-GCaMP6m</i> | Labeling AMA neurons in WT, or <i>Rh5<sup>2</sup>;Rh6<sup>1</sup></i> mutant flies, or <i>norpA<sup>P41</sup></i> flies with <i>norpA</i> rescued in R8s, or <i>Hdc<sup>JK910</sup></i> , or <i>ort<sup>1</sup></i> flies, or flies with ChAT knocked out in R8s                        |
| Fig. 3f | <i>27G06-LexA,LexAop-GFP<br/>24C08-Gal4,UAS-GCaMP6m<br/>ort-Gal4.C1a.DBD, ET.VP16.AD<br/>[tou9A30],UAS-GFP</i>                                                                                                                                                                                                                                                                                                                                                                | Labeling L1, Tm9, Tm20, respectively                                                                                                                                                                                                                                                    |

|                       |                                                                                                                                                                                                                                                                                                                                                                                                          |                                                                                                                                                                                                      |
|-----------------------|----------------------------------------------------------------------------------------------------------------------------------------------------------------------------------------------------------------------------------------------------------------------------------------------------------------------------------------------------------------------------------------------------------|------------------------------------------------------------------------------------------------------------------------------------------------------------------------------------------------------|
|                       | <i>norpA<sup>P41</sup>/y; 27G06-LexA, LexAop-GFP/Rh5-Gal4, Rh6-Gal4, UAS-norpA</i><br><i>norpA<sup>P41</sup>/y; Rh5-Gal4, Rh6-Gal4, UAS-norpA; 24C08-Gal4, UAS-GCaMP6m</i><br><i>norpA<sup>P41</sup>/y; ort-Gal4, C1a.DBD, ET.VP16.AD [tou9A30], UAS-GFP/Rh5-Gal4, Rh6-Gal4, UAS-norpA</i>                                                                                                               | Labeling L1, Tm9, or Tm20 in <i>norpA<sup>P41</sup></i> flies with <i>norpA</i> rescued in R8s                                                                                                       |
|                       | <i>norpA<sup>P41</sup>/y; 27G06-LexA, LexAop-GFP/Rh5-Gal4, Rh6-Gal4, UAS-norpA; HisCl<sup>134</sup>, ort<sup>1</sup></i><br><i>norpA<sup>P41</sup>/y; Rh5-Gal4, Rh6-Gal4, UAS-norpA; 24C08-Gal4, UAS-G6M, HisCl<sup>134</sup>, ort<sup>1</sup></i><br><i>norpA<sup>P41</sup>/y; ort-Gal4, C1a.DBD, ET.VP16.AD [tou9A30], UAS-GFP/Rh5-Gal4, Rh6-Gal4, UAS-NorpA; HisCl<sup>134</sup>, ort<sup>1</sup></i> | Labeling L1, Tm9, or Tm20 in <i>HO</i> and <i>norpA<sup>P41</sup></i> flies with <i>norpA</i> rescued in R8s                                                                                         |
| Fig. 3g               | <i>VT037867-LexA/SS00307-AD; UAS-post-GFP<sup>11</sup>/SS00307-DBD</i><br><i>VT037867-LexA/SS00355-AD; UAS-post-GFP<sup>11</sup>/SS00355-DBD</i>                                                                                                                                                                                                                                                         | p-GRASP between AMA neurons and Tm9 or Tm20                                                                                                                                                          |
| Fig. 3h               | <i>UAS-ort/+; VT037867-Gal4, UAS-GCaMP6m, cry<sup>02</sup>, HisCl<sup>134</sup>, ort<sup>1</sup></i>                                                                                                                                                                                                                                                                                                     | Ectopic ort expression in AMA neurons of <i>CHO</i> flies                                                                                                                                            |
| Fig. 4a               | <i>VT037867-LexA, DvPdf-Gal4/LexAop2-Syb::GFP-P10, LexAop-QF2::SNAP25::HIVNES::Syntaxin; UAS-B3Recombinase, UAS&lt;B3STOP&lt;BoNT/A, UAS&lt;B3STOP&lt;BoNT/A, QUAS-mtdTomato::HA/+</i>                                                                                                                                                                                                                   | Labeling presynaptic AMA neurons of clock neurons with BACTrace                                                                                                                                      |
| Fig. 4b               | <i>UAS-FRT-STOP-FRT-GFP/+; VT037867-Gal4/ChAT-FLP</i><br><i>UAS-CsChrimson/+; DvPdf-LexA, LexAop-GCaMP6m/VT037867-Gal4</i>                                                                                                                                                                                                                                                                               | Labeling ChAT-expressing AMA neurons<br>Expression of CsChrimson and GCaMP in AMA and clock neurons, respectively<br>CsChrimson: red-light-gated cation channel of optogenetic activation of neurons |
| Fig. 4c               | <i>norpA<sup>P41</sup>/y; Rh6-LexA, LexAop-norpA/UAS-TNTE; DvPdf-LexA, LexAop-GCaMP6m/VT037867-Gal4</i>                                                                                                                                                                                                                                                                                                  | Labeling clock neurons in <i>norpA<sup>P41</sup></i> flies with <i>norpA</i> rescued in R8s and with AMA neurons silenced by TNT                                                                     |
| Fig. 4d               | <i>pBPhsFlp2::PEST/+;; UAS-FRT&gt;STOP&gt;FRT-myr::smGFP-HA, UAS-FRT&gt;STOP&gt;FRT-myr::smGFP-V5-THS-10XUAS-FRT&gt;STOP&gt;FRT-myr::smGFP-FLAG/VT037867-Gal4</i>                                                                                                                                                                                                                                        | Single-cell labeling of AMA neurons by MCFO<br>MCFO: Multi-Color-Flip-Out method for sparse-labelling                                                                                                |
| Fig. 4e               | <i>pBPhsFlp2::PEST/+; Rh5-eGFP/Rh6-LexA, LexAop-tdTomato; UAS-FRT&gt;STOP&gt;FRT-myr::smGFP-HA, UAS-FRT&gt;STOP&gt;FRT-myr::smGFP-V5-THS-10XUAS-FRT&gt;STOP&gt;FRT-myr::smGFP-FLAG/VT037867-Gal4</i>                                                                                                                                                                                                     | Simultaneous labeling of pR8s, yR8s, and AMA neurons                                                                                                                                                 |
| Fig. 4f               | <i>VT037867-Gal4, UAS-GCaMP6m shakB<sup>2</sup>/y;; VT037867-Gal4, UAS-GCaMP6m</i>                                                                                                                                                                                                                                                                                                                       | Labeling AMA neuron in <i>shakB<sup>2</sup></i> flies<br><i>ShakB<sup>2</sup></i> : mutant of innexin8, which constitutes the gap junction channel                                                   |
| Fig. 5a               | <i>cry<sup>02</sup>, HisCl<sup>134</sup>, ort<sup>1</sup></i><br><i>Rh6-Gal4/UAS-HisCl<sup>134</sup>; cry<sup>02</sup>, HisCl<sup>134</sup>, ort<sup>1</sup></i>                                                                                                                                                                                                                                         | HisCl <sup>134</sup> expression in R8s of <i>CHO</i> flies                                                                                                                                           |
| Fig. 5b               | <i>VT037867-Gal4, UAS-GCaMP6m</i><br><i>VT037867-LexA, LexAop2-GFP; cry<sup>02</sup>, ort<sup>1</sup></i><br><i>VT037867-LexA, LexAop2-GFP; cry<sup>02</sup>, HisCl<sup>134</sup>, ort<sup>1</sup></i>                                                                                                                                                                                                   | Labeling AMA neurons in <i>CO</i> or <i>CHO</i> flies                                                                                                                                                |
| Fig. 5c               | <i>Rh6-Gal4, UAS-HisCl<sup>134</sup>/VT037867-LexA, LexAop2-GFP; cry<sup>02</sup>, HisCl<sup>134</sup>, ort<sup>1</sup></i>                                                                                                                                                                                                                                                                              | HisCl <sup>134</sup> expression in yR8s of <i>CHO</i> flies                                                                                                                                          |
| Fig. 5d               | <i>UAS-ort; VT037867-Gal4, UAS-GCaMP6m</i><br><i>UAS-ort; VT037867-Gal4, UAS-G6M, HisCl<sup>134</sup>, ort<sup>1</sup></i>                                                                                                                                                                                                                                                                               | Ectopic ort expressing in AMA neurons of WT or <i>HO</i> flies                                                                                                                                       |
| Fig. 5e               | <i>VT037867-Gal4, UAS-GCaMP6m, cry<sup>02</sup>, HisCl<sup>134</sup>, ort<sup>1</sup></i>                                                                                                                                                                                                                                                                                                                | Labeling AMA neurons in <i>CHO</i> flies                                                                                                                                                             |
| Fig. 5f               | <i>VT037867-Gal4, UAS-GCaMP6m</i><br><i>VT037867-Gal4, UAS-GCaMP6m, HisCl<sup>134</sup>, ort<sup>1</sup></i>                                                                                                                                                                                                                                                                                             | Labeling AMA neurons in WT or <i>CHO</i> flies                                                                                                                                                       |
| Fig. 5g               | <i>cry<sup>02</sup>, HisCl<sup>134</sup>, ort<sup>1</sup></i>                                                                                                                                                                                                                                                                                                                                            | <i>CHO</i> flies                                                                                                                                                                                     |
| Extended Data Fig. 1a | <i>DvPdf-Gal4, UAS-GFP; HisCl<sup>134</sup>, ort<sup>1</sup></i><br><i>norpA<sup>P41</sup>; DvPdf-Gal4, UAS-GFP</i>                                                                                                                                                                                                                                                                                      | Labeling clock neurons in <i>norpA<sup>P41</sup></i> single mutant flies and <i>CHO</i> triple mutant flies                                                                                          |

|                         |                                                                                                                                                                                                                                                                                                                                                                                                                                                                                                                     |                                                                                               |
|-------------------------|---------------------------------------------------------------------------------------------------------------------------------------------------------------------------------------------------------------------------------------------------------------------------------------------------------------------------------------------------------------------------------------------------------------------------------------------------------------------------------------------------------------------|-----------------------------------------------------------------------------------------------|
|                         | <i>DvPdf-Gal4,UAS-GFP; cry<sup>02</sup>,HisCl1<sup>134</sup>,ort<sup>1</sup></i>                                                                                                                                                                                                                                                                                                                                                                                                                                    |                                                                                               |
| Extended Data Fig. 1b   | <i>Rh6-Gal4,UAS-GFP</i><br><i>Rh6-hid,rpr/+; Rh6-Gal4,UAS-GFP</i>                                                                                                                                                                                                                                                                                                                                                                                                                                                   | Labeling yR8s in WT or flies with H-B eyelets genetically ablated                             |
| Extended Data Fig. 1c   | <i>Rh6-Gal4,UAS-GFP</i><br><i>Rh6-hid,rpr/+; Rh6-Gal4,UAS-GFP</i>                                                                                                                                                                                                                                                                                                                                                                                                                                                   | Labeling yR8s in WT or flies with H-B eyelets genetically ablated                             |
| Extended Data Fig. 1d   | <i>DvPdf-Gal4,UAS-GFP/Rh6-eGFP; HisCl1<sup>134</sup>,ort<sup>1</sup></i>                                                                                                                                                                                                                                                                                                                                                                                                                                            | Labeling clock neurons, H-B eyelets and yR8s in <i>HO</i> flies                               |
| Extended Data Fig. 1e-g | <i>Rh6-LexA,LexAop2-GCaMP6f</i>                                                                                                                                                                                                                                                                                                                                                                                                                                                                                     | Labeling yR8s and H-B eyelets before and after laser cutting                                  |
| Extended Data Fig. 1h   | <i>DvPdf-Gal4,UAS-GFP; HisCl1<sup>134</sup>,ort<sup>1</sup></i><br><i>DvPdf-Gal4,UAS-GFP/Rh1-Gal4,UAS-TNTE; HisCl1<sup>134</sup>,ort<sup>1</sup></i><br><i>DvPdf-Gal4,UAS-GFP/Rh3+4-Gal4,UAS-TNTE; HisCl1<sup>134</sup>,ort<sup>1</sup></i><br><i>DvPdf-Gal4,UAS-GFP/Rh5-Gal4,UAS-TNTE; HisCl1<sup>134</sup>,ort<sup>1</sup></i><br><i>DvPdf-Gal4,UAS-GFP/Rh6-Gal4,UAS-TNTE; HisCl1<sup>134</sup>,ort<sup>1</sup></i><br><i>DvPdf-Gal4,UAS-GFP/Rh5-Gal4,Rh6-Gal4,UAS-TNTE; HisCl1<sup>134</sup>,ort<sup>1</sup></i> | Labeling clock neurons in <i>HO</i> flies with different photoreceptors silenced by TNT       |
| Extended Data Fig. 2a   | <i>GMR-Gal4,UAS-GFP</i><br><i>HDC-Gal4,UAS-GFP/GMR-LexA,LexAop2-tdTomato</i>                                                                                                                                                                                                                                                                                                                                                                                                                                        | Co-labeling histaminergic cells and eye photoreceptors                                        |
| Extended Data Fig. 2b   | <i>Rh5-Gal4/+; Rh6-Gal4,UAS-GFP/+</i><br><i>HDC-Gal4,UAS-GFP/Rh5-LexA,Rh6-LexA,LexAop2-tdTomato</i>                                                                                                                                                                                                                                                                                                                                                                                                                 | Co-labeling histaminergic cells and R8s                                                       |
| Extended Data Fig. 2c   | <i>Rh1-Gal4/UAS-FRT-STOP-FRT-GFP; Chat-FLP/+</i><br><i>Rh3-Gal4/UAS-FRT-STOP-FRT-GFP; Chat-FLP/+</i><br><i>Rh4-Gal4/UAS-FRT-STOP-FRT-GFP; Chat-FLP/+</i>                                                                                                                                                                                                                                                                                                                                                            | Labeling cholinergic cells that express Rh1, Rh3, or Rh4                                      |
|                         | <i>vGlut-FLP/ Rh1-Gal4; UAS-FRT-STOP-FRT-GFP/+</i><br><i>vGlut-FLP/ Rh3-Gal4; UAS-FRT-STOP-FRT-GFP/+</i><br><i>vGlut-FLP/ Rh4-Gal4; UAS-FRT-STOP-FRT-GFP/+</i>                                                                                                                                                                                                                                                                                                                                                      | Labeling glutamatergic cells that express Rh1, Rh3, or Rh4                                    |
|                         | <i>Rh1-Gal4/UAS-FRT-STOP-FRT-GFP; TH-FLP/+</i><br><i>Rh3-Gal4/UAS-FRT-STOP-FRT-GFP; TH-FLP/+</i><br><i>Rh4-Gal4/UAS-FRT-STOP-FRT-GFP; TH-FLP/+</i>                                                                                                                                                                                                                                                                                                                                                                  | Labeling dopaminergic cells that express Rh1, Rh3, or Rh4                                     |
| Extended Data Fig. 2d   | <i>Rh1-Gal4/vGAT-LexA; UAS-FRT-STOP-FRT-CsChrimson,LexAop-FLP</i><br><i>Rh3-Gal4/vGAT-LexA; UAS-FRT-STOP-FRT-CsChrimson,LexAop-FLP</i><br><i>Rh4-Gal4/vGAT-LexA; UAS-FRT-STOP-FRT-CsChrimson,LexAop-FLP</i>                                                                                                                                                                                                                                                                                                         | Labeling GABAergic cells that express Rh1, Rh3, or Rh4                                        |
|                         | <i>vGlut-FLP/ Rh5-Gal4,Rh6-Gal4; UAS-FRT-STOP-FRT-GFP/+</i><br><i>Rh5-Gal4,Rh6-Gal4/UAS-FRT-STOP-FRT-GFP; TH-FLP/+</i><br><i>Rh5-Gal4,Rh6-Gal4/vGAT-LexA; UAS-FRT-STOP-FRT-CsChrimson,LexAop-FLP/+</i><br><i>Rh5-Gal4,Rh6-Gal4/UAS-FRT-STOP-FRT-GFP; Trh-FLP/+</i>                                                                                                                                                                                                                                                  | Labeling R8s that contain glutamate, dopamine, GABA, or serotonin                             |
|                         | <i>Rh5-Gal4,Rh6-Gal4; UAS-norpA</i><br><i>norpA<sup>P41</sup>/y</i><br><i>norpA<sup>P41</sup>/y; Rh5-Gal4,Rh6-Gal4/+; UAS-norpA/+</i>                                                                                                                                                                                                                                                                                                                                                                               | <i>norpA</i> rescue in R8s of <i>norpA<sup>P41</sup></i> flies                                |
| Extended Data Fig. 3b   | <i>w<sup>1118</sup></i><br><i>norpA<sup>P41</sup>; cry<sup>02</sup></i><br><i>norpA<sup>P41</sup>/y; Rh5-Gal4,Rh6-Gal4,UAS-norpA; cry<sup>02</sup></i>                                                                                                                                                                                                                                                                                                                                                              | <i>norpA</i> rescue in R8s of <i>norpA<sup>P41</sup>;cry<sup>02</sup></i> double mutant flies |

|                         |                                                                                                                                                                                                                                                                                                                                                            |                                                                                                                               |
|-------------------------|------------------------------------------------------------------------------------------------------------------------------------------------------------------------------------------------------------------------------------------------------------------------------------------------------------------------------------------------------------|-------------------------------------------------------------------------------------------------------------------------------|
|                         | <i>norpA<sup>P41</sup>/y; Rh5-Gal4,Rh6-Gal4,UAS-norpA/Rh6-hid,rpr; cry<sup>02</sup></i>                                                                                                                                                                                                                                                                    | norpA rescue in R8s of <i>norpA<sup>P41</sup>;cry<sup>02</sup></i> double mutant flies (with H-B eyelets ablated genetically) |
| Extended Data Fig. 3c   | <i>norpA<sup>P41</sup>/y; Rh5-Gal4,Rh6-Gal4,UAS-norpA/UAS-Hdc-sgRNA,UAS-Cas9.P2</i>                                                                                                                                                                                                                                                                        | Knocking out <i>hdc</i> in R8s with <i>norpA</i> rescued in <i>norpA<sup>P41</sup></i> flies                                  |
| Extended Data Fig. 3d   | <i>norpA<sup>P41</sup>; Rh5-Gal4, Rh6-Gal4,UAS-norpA; ort<sup>1</sup>,cry<sup>02</sup></i>                                                                                                                                                                                                                                                                 | norpA rescue in R8s of <i>norpA<sup>P41</sup>;cry<sup>02</sup>,ort<sup>1</sup></i> triple mutant flies                        |
| Extended Data Fig. 3e   | <i>norpA<sup>P41</sup>/y; Rh5-Gal4,Rh6-Gal4,UAS-norpA/UAS-ChAT-sgRNA,UAS-Cas9.P2; ort<sup>1</sup>,cry<sup>02</sup></i>                                                                                                                                                                                                                                     | ChAT knockout in <i>norpA</i> -rescued R8s of <i>norpA<sup>P41</sup>;ort<sup>1</sup>, cry<sup>02</sup></i> flies              |
| Extended Data Fig. 3f   | <i>norpA<sup>P41</sup>/y; Rh5-Gal4,Rh6-Gal4,UAS-norpA/UAS-Cas9.P2,UAS-ChAT-sgRNA</i>                                                                                                                                                                                                                                                                       | ChAT knockout in <i>norpA</i> -rescued R8s of <i>norpA<sup>P41</sup></i> flies                                                |
| Extended Data Fig. 4a   | <i>UAS-GFP,QUAS-tdTomato/+; Rh5-Gal4/trans-Tango</i><br><i>UAS-GFP,QUAS-tdTomato/+; Rh6-Gal4/trans-Tango</i>                                                                                                                                                                                                                                               | Labeling postsynaptic neurons of pR8s and yR8s                                                                                |
| Extended Data Fig. 4b   | <i>UAS-GFP,QUAS-tdTomato/+; Rh5-Gal4,VT037867-LexA, LexAop-GFP/trans-Tango; ort-QS/+</i><br><i>UAS-GFP,QUAS-tdTomato/+; VT037867-LexA, LexAop-GFP/trans-Tango; Rh6-Gal4/ort-QS</i>                                                                                                                                                                         | Co-labeling of AMA neurons and non- <i>ort</i> target of R8s                                                                  |
| Extended Data Fig. 4c   | <i>pBPhsFlp2::PEST/+; UAS-FRT&gt;STOP&gt;FRT-myr::smGFP-HA,UAS-FRT&gt;STOP&gt;FRT-myr::smGFP-V5-THS-10XUAS-FRT&gt;STOP&gt;FRT-myr::smGFP-FLAG/VT037867-Gal4</i>                                                                                                                                                                                            | Single-cell labeling of AMA neurons with MCFO                                                                                 |
| Extended Data Fig. 4d   | <i>VT037867-Gal4, UAS-GCaMP6m</i>                                                                                                                                                                                                                                                                                                                          | Single-cell labeling of AMA neurons by neurobiotin injection                                                                  |
| Extended Data Fig. 4e   | <i>pBPhsFlp2::PEST/+; GMR-RFP/+; UAS-FRT&gt;STOP&gt;FRT-myr::smGFP-HA,UAS-FRT&gt;STOP&gt;FRT-myr::smGFP-V5-THS-10XUAS-FRT&gt;STOP&gt;FRT-myr::smGFP-FLAG/VT037867-Gal4</i>                                                                                                                                                                                 | Co-labeling of photoreceptors and single AMA neuron                                                                           |
| Extended Data Fig. 4f   | <i>pBPhsFlp2::PEST/+; Rh5-eGFP/+; UAS-FRT&gt;STOP&gt;FRT-myr::smGFP-HA,UAS-FRT&gt;STOP&gt;FRT-myr::smGFP-V5-THS-10XUAS-FRT&gt;STOP&gt;FRT-myr::smGFP-FLAG/VT037867-Gal4</i><br><i>pBPhsFlp2::PEST/+; Rh6-eGFP/+; UAS-FRT&gt;STOP&gt;FRT-myr::smGFP-HA,UAS-FRT&gt;STOP&gt;FRT-myr::smGFP-V5-THS-10XUAS-FRT&gt;STOP&gt;FRT-myr::smGFP-FLAG/VT037867-Gal4</i> | Co-labeling of pR8s and single AMA neuron<br>Co-labeling of yR8s and single AMA neuron                                        |
| Extended Data Fig. 4g   | <i>VT037867-LexA/SS00307-AD; UAS-GFP<sup>10</sup>,LexAop-GFP<sup>11</sup>/SS00307-DBD</i><br><i>VT037867-LexA/SS00355-AD; UAS-GFP<sup>10</sup>,LexAop-GFP<sup>11</sup>/SS00355-DBD</i>                                                                                                                                                                     | GRASP between AMA neuron and Tm9<br>GRASP between AMA neuron and Tm20                                                         |
| Extended Data Fig. 5a,b | <i>UAS-sPA-GFP/+; UAS-tdTomato/VT037867-Gal4</i>                                                                                                                                                                                                                                                                                                           | Labeling AMA neurons with photoactivable GFP                                                                                  |
| Extended Data Fig. 5c   | <i>UAS-RFP, LexAop-GFP/+; SS01050-AD/VT037867-LexA; SS01050-DBD/+</i>                                                                                                                                                                                                                                                                                      | Co-labeling AMA neurons ( <i>VT037867-LexA</i> ) and aMe12 neurons.                                                           |
| Extended Data Fig. 5d   | <i>UAS-GFP,QUAS-tdTomato/+; Rh5-Gal4/trans-Tango; ort-LexA, LexAop-GFP/+</i><br><i>UAS-GFP,QUAS-tdTomato/+; Rh6-Gal4/trans-Tango; ort-LexA, LexAop-GFP/+</i>                                                                                                                                                                                               | Co-labeling <i>ort</i> -expressing cells and postsynaptic neurons of pR8s or yR8s                                             |
| Extended Data Fig. 5e   | <i>UAS-FRT-STOP-FRT-CsChrimson, LexAop-FLP/SS00691-AD; ort-LexA/SS00691-DBD</i><br><i>UAS-FRT-STOP-FRT-CsChrimson, LexAop-FLP/ort-Gal4.C1a.DBD; ort-LexA/dVPI6AD[ETI8k]</i>                                                                                                                                                                                | Labeling <i>ort</i> -expressing L1, Tm5, Tm9, or Tm20, respectively                                                           |



|                         |                                                                                                                                                                                                                                                                                                                                                                                   |                                                                                                                                 |
|-------------------------|-----------------------------------------------------------------------------------------------------------------------------------------------------------------------------------------------------------------------------------------------------------------------------------------------------------------------------------------------------------------------------------|---------------------------------------------------------------------------------------------------------------------------------|
|                         | <i>UAS-FRT-STOP-FRT-CsChrimson, LexAop-FLP/SS00307-AD; ort-LexA/SS00307-DBD</i><br><i>UAS-FRT-STOP-FRT-CsChrimson, LexAop-FLP/SS00355-AD; ort-LexA/SS00355-DBD</i>                                                                                                                                                                                                                |                                                                                                                                 |
| Extended Data Fig. 5f   | <i>Rh6-LexA/SS00691-AD; UAS-GFP<sup>1-10</sup>, LexAop-GFP<sup>11</sup>/SS00691-DBD</i><br><i>Rh6-LexA/ort-Gal4.C1a.DBD; UAS-GFP<sup>1-10</sup>, LexAop-GFP<sup>11</sup>/dVP16AD[ET18k]</i><br><i>Rh6-LexA/SS00307-AD; UAS-GFP<sup>1-10</sup>, LexAop-GFP<sup>11</sup>/SS00307-DBD</i><br><i>Rh6-LexA/SS00355-AD; UAS-GFP<sup>1-10</sup>, LexAop-GFP<sup>11</sup>/SS00355-DBD</i> | GRASP between yR8s and L1, Tm5, Tm9, or Tm20, respectively                                                                      |
| Extended Data Fig. 6a   | <i>norpA<sup>P41</sup>/y; VT037867-Gal4, UAS-GCaMP6m/+</i><br><i>norpA<sup>P41</sup>/y; Rh5-Gal4, Rh6-Gal4/+; VT037867-Gal4, UAS-GCaMP6m/UAS-norpA</i>                                                                                                                                                                                                                            | Labeling AMA neurons in <i>norpA<sup>P41</sup></i> flies or <i>norpA<sup>P41</sup></i> flies with <i>norpA</i> rescued in R8s   |
| Extended Data Fig. 6b   | <i>norpA<sup>P41</sup>/y; 27G06-LexA, LexAop-GFP/Rh5-Gal4, Rh6-Gal4, UAS-norpA</i><br><i>norpA<sup>P41</sup>/y; Rh5-Gal4, Rh6-Gal4, UAS-norpA; 24C08-Gal4, UAS-GCaMP6m</i><br><i>norpA<sup>P41</sup>/y; ort-Gal4.C1a.DBD, ET.VP16.AD [tou9A30], UAS-GFP/Rh5-Gal4, Rh6-Gal4, UAS-norpA</i>                                                                                         | Labeling L1, Tm9, or Tm20 in <i>norpA<sup>P41</sup></i> flies with <i>norpA</i> rescued in R8s                                  |
| Extended Data Fig. 6c   | <i>27G06-LexA, LexAop-GFP</i><br><i>24C08-Gal4, UAS-GCaMP6m</i><br><i>ort-Gal4.C1a.DBD, ET.VP16.AD [tou9A30], UAS-GFP</i>                                                                                                                                                                                                                                                         | Labeling L1, Tm9, or Tm20                                                                                                       |
| Extended Data Fig. 6e   | <i>VT037867-LexA/SS00690-AD; UAS-post-GFP<sup>1-10</sup>, LexAop-post-GFP<sup>11</sup>/SS00690-DBD</i>                                                                                                                                                                                                                                                                            | p-GRASP between AMA neurons and L2 neurons                                                                                      |
| Extended Data Fig. 6f   | <i>VT037867-LexA/SS00307-AD; UAS-post-GFP<sup>1-10</sup>, LexAop-post-GFP<sup>11</sup>/SS00307-DBD</i><br><i>VT037867-LexA/SS00355-AD; UAS-post-GFP<sup>1-10</sup>, LexAop-post-GFP<sup>11</sup>/SS00355-DBD</i>                                                                                                                                                                  | p-GRASP between AMA neurons and Tm9 and Tm20 neurons                                                                            |
| Extended Data Fig. 6g   | <i>VT037867-Gal4, UAS-GCaMP6m</i><br><i>UAS-ort/+; VT037867-Gal4, UAS-GCaMP6m</i>                                                                                                                                                                                                                                                                                                 | Labeling AMA neurons.<br>Labeling AMA neurons that ectopically express <i>ort</i>                                               |
| Extended Data Fig. 7a,b | <i>trans-Tango/+; VT03867-Gal4, QUAS-tdTomato/+</i>                                                                                                                                                                                                                                                                                                                               | Labeling postsynaptic neurons of AMA neurons                                                                                    |
| Extended Data Fig. 7c   | <i>trans-Tango/+; VT03867-Gal4, QUAS-tdTomato/R54D11-LexA, LexAop-GCaMP7s</i>                                                                                                                                                                                                                                                                                                     | Co-labeling ITP-LNd/5 <sup>th</sup> s-LNv and postsynaptic neurons of AMA neurons                                               |
| Extended Data Fig. 7d   | <i>UAS-CsChrimson/+; DvPdf-LexA, LexAop-GCaMP6m/VT037867-Gal4</i>                                                                                                                                                                                                                                                                                                                 | Expression of CsChrimson and GCaMP in AMA and clock neurons, respectively                                                       |
| Extended Data Fig. 7e   | <i>norpA<sup>P41</sup>/y; Rh5-Gal4, Rh6-Gal4, UAS-NorpA/Rh6-eGFP; DvPdf-LexA, LexAop-GCaMP6m/+</i>                                                                                                                                                                                                                                                                                | Labeling clock neurons in <i>norpA<sup>P41</sup></i> flies with <i>norpA</i> rescued in R8s of (with H-B eyelets laser-ablated) |
| Extended Data Fig. 8a   | <i>VT037867-Gal4, UAS-GFP</i><br><i>shakB<sup>2</sup>/y; VT037867-Gal4, UAS-GFP/+</i><br><i>UAS-GFP, QUAS-tdTomato/+; trans-Tango/+; VT037867-Gal4/+</i>                                                                                                                                                                                                                          | Labeling AMA neuron in <i>shakB<sup>2</sup></i> flies                                                                           |
| Extended Data Fig. 8c   | <i>UAS-GCaMP6m; VT037867-Gal4, UAS-GCaMP6m/+</i>                                                                                                                                                                                                                                                                                                                                  | Labeling AMA neurons                                                                                                            |
| Extended Data Fig. 9a   | <i>VT037867-Gal4, UAS-GCaMP6m</i><br><i>VT037867-LexA, LexAop2-GFP; cry<sup>02</sup>, ort<sup>1</sup></i><br><i>VT037867-LexA, LexAop2-GFP; cry<sup>02</sup>, HisCII<sup>134</sup>, ort<sup>1</sup></i>                                                                                                                                                                           | Labeling AMA neurons in <i>CO</i> or <i>CHO</i> flies                                                                           |
| Extended Data Fig. 9b   | <i>VT037867-Gal4, UAS-GCaMP6m</i>                                                                                                                                                                                                                                                                                                                                                 | Labeling AMA neurons                                                                                                            |
| Extended Data Fig. 9c   | <i>norpA<sup>P41</sup>/y; Rh5-Gal4, Rh6-Gal4/+; VT037867-Gal4, UAS-GCaMP6m/UAS-norpA</i><br><i>norpA<sup>P41</sup>/y; Rh5-Gal4, Rh6-Gal4, UAS-norpA/VT037867-LexA, LexAop-GFP; cry<sup>02</sup>, ort<sup>1</sup></i><br><i>norpA<sup>P41</sup>/y; Rh5-Gal4, Rh6-Gal4, UAS-norpA/VT037867-LexA, LexAop-GFP; cry<sup>02</sup>, HisCII<sup>134</sup>, ort<sup>1</sup></i>            | Labeling AMA neurons in <i>norpA<sup>P41</sup>; CHO</i> (or <i>CO</i> ) flies with <i>norpA</i> rescued in R8s                  |

|                                |                                                                                                                                     |                                               |
|--------------------------------|-------------------------------------------------------------------------------------------------------------------------------------|-----------------------------------------------|
| Extended<br>Data Fig. 9d       | <i>VT037867-Gal4,UAS-GCaMP6m</i><br><i>VT037867-Gal4,UAS-GCaMP6m,HisCl1<sup>134</sup>,ort<sup>1</sup></i>                           | Labeling AMA neurons in WT or <i>HO</i> flies |
| Extended<br>Data Fig. 9e       | <i>Rh6-LexA,LexAop2-GCaMP6f</i><br><i>Rh6-LexA,LexAop2-GCaMP6f;</i><br><i>cry<sup>02</sup>,HisCl1<sup>134</sup>,ort<sup>1</sup></i> | Labeling yR8s in WT or <i>CHO</i> flies       |
| Extended<br>Data Fig. 9f       | <i>UAS-ort; VT037867-Gal4,UAS-GCaMP6m</i>                                                                                           | Ectopic <i>ort</i> expression in AMA neurons  |
| Extended<br>Data Fig.<br>10a,b | <i>DvPdf-Gal4,UAS-GFP; cry<sup>02</sup>,HisCl1<sup>134</sup>,ort<sup>1</sup></i>                                                    | Labeling clock neurons in <i>CHO</i> flies    |
| Extended<br>Data Fig.<br>10c   | <i>w<sup>1118</sup></i>                                                                                                             | Re-entrainment in wild type flies.            |

## Supplementary Table 2 | Statistical details

| Figure                                                              | Cell type                                                                                 | P value                                                                                                                     |
|---------------------------------------------------------------------|-------------------------------------------------------------------------------------------|-----------------------------------------------------------------------------------------------------------------------------|
| Fig. 1b                                                             | 1-LNv                                                                                     | WT (n = 9 from 5 flies) vs. HO (n = 11 from 7 flies), P = 2.0690E-6                                                         |
|                                                                     |                                                                                           | WT (n = 9 from 5 flies) vs. HDC (n = 11 from 7 flies), P = 0.0078                                                           |
|                                                                     |                                                                                           | HO (n = 11 from 7 flies) vs. HDC (n = 11 from 7 flies), P = 0.0317                                                          |
|                                                                     | s-LNv                                                                                     | WT (n = 8 from 5 flies) vs. HO (n = 8 from 5 flies), P = 0.0049                                                             |
|                                                                     |                                                                                           | WT (n = 8 from 5 flies) vs. HDC (n = 6 from 6 flies), P = 0.0215                                                            |
|                                                                     |                                                                                           | HO (n = 8 from 7 flies) vs. HDC (n = 8 from 8 flies), P = 0.8511                                                            |
|                                                                     | ITP-LNd                                                                                   | WT (n = 8 from 6 flies) vs. HO (n = 7 from 6 flies), P = 0.0001                                                             |
|                                                                     |                                                                                           | WT (n = 8 from 6 flies) vs. HDC (n = 6 from 5 flies), P = 0.0026                                                            |
|                                                                     | 5 <sup>th</sup> s-LNv                                                                     | HO (n = 7 from 6 flies) vs. HDC (n = 6 from 5 flies), P = 0.5360                                                            |
|                                                                     |                                                                                           | WT (n = 6 from 6 flies) vs. HO (n = 8 from 7 flies), P = 4.3027E-5                                                          |
| WT (n = 6 from 6 flies) vs. HDC (n = 8 from 8 flies), P = 1.0067E-5 |                                                                                           |                                                                                                                             |
| Fig. 1c                                                             | 1-LNv                                                                                     | HO (n = 8 from 7 flies) vs. HDC (n = 8 from 8 flies), P = 0.7404                                                            |
|                                                                     |                                                                                           | HO (n = 11 from 7 flies) vs. HO+norpA <sup>P41</sup> (n = 5 from 5 flies), P = 2.2389E-8                                    |
|                                                                     |                                                                                           | HO (n = 11 from 7 flies) vs. HO+eye removal (n = 5 from 5 flies), P = 2.2389E-8                                             |
|                                                                     |                                                                                           | HO (n = 11 from 7 flies) vs. HO+Rh6-hid,rpr (n = 16 from 10 flies), P = 0.0006                                              |
|                                                                     |                                                                                           | HO (n = 11 from 7 flies) vs. HO+H-B ablation (n = 6 from 6 flies), P = 0.0005                                               |
|                                                                     | s-LNv                                                                                     | HO+Rh6-hid,rpr (n = 16 from 10 flies) vs. HO+H-B ablation (n = 6 from 6 flies), P = 0.5321                                  |
|                                                                     |                                                                                           | HO (n = 8 from 5 flies) vs. HO+norpA <sup>P41</sup> (n = 6 from 5 flies), P = 0.0139                                        |
|                                                                     |                                                                                           | HO (n = 8 from 5 flies) vs. HO+eye removal (n = 6 from 5 flies), P = 0.0139                                                 |
|                                                                     |                                                                                           | HO (n = 8 from 5 flies) vs. HO+Rh6-hid,rpr (n = 10 from 6 flies), P = 0.0207                                                |
|                                                                     |                                                                                           | HO (n = 8 from 5 flies) vs. HO+H-B ablation (n = 9 from 6 flies), P = 0.0385                                                |
| ITP-LNd                                                             | HO+Rh6-hid,rpr (n = 10 from 6 flies) vs. HO+H-B ablation (n = 9 from 6 flies), P = 0.9855 |                                                                                                                             |
|                                                                     | HO (n = 7 from 6 flies) vs. HO+norpA <sup>P41</sup> (n = 5 from 5 flies), P = 0           |                                                                                                                             |
|                                                                     | HO (n = 7 from 6 flies) vs. HO+eye removal (n = 5 from 5 flies), P = 0                    |                                                                                                                             |
|                                                                     | HO (n = 7 from 6 flies) vs. HO+Rh6-hid,rpr (n = 11 from 9 flies), P = 0.9968              |                                                                                                                             |
|                                                                     | HO (n = 7 from 6 flies) vs. HO+H-B ablation (n = 6 from 6 flies), P = 0.1764              |                                                                                                                             |
| 5 <sup>th</sup> s-LNv                                               | HO+Rh6-hid,rpr (n = 11 from 9 flies) vs. HO+H-B ablation (n = 6 from 6 flies), P = 0.1467 |                                                                                                                             |
|                                                                     | HO (n = 8 from 7 flies) vs. HO+norpA <sup>P41</sup> (n = 5 from 5 flies), P = 6.9374E-6   |                                                                                                                             |
|                                                                     | HO (n = 8 from 7 flies) vs. HO+eye removal (n = 5 from 5 flies), P = 6.9346E-6            |                                                                                                                             |
|                                                                     | HO (n = 8 from 7 flies) vs. HO+Rh6-hid,rpr (n = 10 from 10 flies), P = 0.3838             |                                                                                                                             |
|                                                                     | HO (n = 8 from 7 flies) vs. HO+H-B ablation (n = 6 from 6 flies), P = 0.8349              |                                                                                                                             |
| Fig. 1d-middle                                                      | 1-LNv                                                                                     | HO+Rh6-hid,rpr (n = 10 from 10 flies) vs. HO+H-B ablation (n = 6 from 6 flies), P = 0.7999                                  |
|                                                                     |                                                                                           | HO+norpA <sup>P41</sup> (n = 5 from 5 flies) vs. HO+norpA <sup>P41</sup> +Rh1>norpA rescue (n = 7 from 5 flies), P = 1      |
|                                                                     |                                                                                           | HO+norpA <sup>P41</sup> (n = 5 from 5 flies) vs. HO+norpA <sup>P41</sup> +Rh3>norpA rescue (n = 9 from 5 flies), P = 1      |
|                                                                     |                                                                                           | HO+norpA <sup>P41</sup> (n = 5 from 5 flies) vs. HO+norpA <sup>P41</sup> +Rh4>norpA rescue (n = 8 from 6 flies), P = 1      |
|                                                                     |                                                                                           | HO+norpA <sup>P41</sup> (n = 5 from 5 flies) vs. HO+norpA <sup>P41</sup> +Rh5>norpA rescue (n = 6 from 6 flies), P = 0.0111 |
|                                                                     | s-LNv                                                                                     | HO+norpA <sup>P41</sup> (n = 5 from 5 flies) vs. HO+norpA <sup>P41</sup> +Rh6>norpA rescue (n = 6 from 6 flies), P = 0.0165 |
|                                                                     |                                                                                           | HO+norpA <sup>P41</sup> (n = 6 from 5 flies) vs. HO+norpA <sup>P41</sup> +Rh1>norpA rescue (n = 6 from 5 flies), P = 1      |

|               |                                         |                       |                                                                                                                                                                                                                                                                                                                                                                                                                                                                                                                                                                                                                                          |         |                                                                                                                                                                                                  |
|---------------|-----------------------------------------|-----------------------|------------------------------------------------------------------------------------------------------------------------------------------------------------------------------------------------------------------------------------------------------------------------------------------------------------------------------------------------------------------------------------------------------------------------------------------------------------------------------------------------------------------------------------------------------------------------------------------------------------------------------------------|---------|--------------------------------------------------------------------------------------------------------------------------------------------------------------------------------------------------|
| Fig. 1d-right | Kruskal-Wallis followed by Dunn's tests |                       | HO+norpA <sup>P41</sup> (n = 6 from 5 flies) vs. HO+norpA <sup>P41</sup> +Rh3>norpA rescue (n = 8 from 6 flies), P = 1<br>HO+norpA <sup>P41</sup> (n = 6 from 5 flies) vs. HO+norpA <sup>P41</sup> +Rh4>norpA rescue (n = 7 from 6 flies), P = 1<br>HO+norpA <sup>P41</sup> (n = 6 from 5 flies) vs. HO+norpA <sup>P41</sup> +Rh5>norpA rescue (n = 5 from 5 flies), P = 0.0251<br>HO+norpA <sup>P41</sup> (n = 6 from 5 flies) vs. HO+norpA <sup>P41</sup> +Rh6>norpA rescue (n = 6 from 6 flies), P = 0.0059                                                                                                                           |         |                                                                                                                                                                                                  |
|               |                                         | ITP-LNd               | HO+norpA <sup>P41</sup> (n = 5 from 5 flies) vs. HO+norpA <sup>P41</sup> +Rh1>norpA rescue (n = 6 from 6 flies), P = 1<br>HO+norpA <sup>P41</sup> (n = 5 from 5 flies) vs. HO+norpA <sup>P41</sup> +Rh3>norpA rescue (n = 9 from 7 flies), P = 1<br>HO+norpA <sup>P41</sup> (n = 5 from 5 flies) vs. HO+norpA <sup>P41</sup> +Rh4>norpA rescue (n = 8 from 6 flies), P = 1<br>HO+norpA <sup>P41</sup> (n = 5 from 5 flies) vs. HO+norpA <sup>P41</sup> +Rh5>norpA rescue (n = 7 from 6 flies), P = 0.0028<br>HO+norpA <sup>P41</sup> (n = 5 from 5 flies) vs. HO+norpA <sup>P41</sup> +Rh6>norpA rescue, P = 0.0034                      |         |                                                                                                                                                                                                  |
|               |                                         | 5 <sup>th</sup> s-LNv | HO+norpA <sup>P41</sup> (n = 5 from 5 flies) vs. HO+norpA <sup>P41</sup> +Rh1>norpA rescue (n = 6 from 6 flies), P = 1<br>HO+norpA <sup>P41</sup> (n = 5 from 5 flies) vs. HO+norpA <sup>P41</sup> +Rh3>norpA rescue (n = 8 from 7 flies), P = 1<br>HO+norpA <sup>P41</sup> (n = 5 from 5 flies) vs. HO+norpA <sup>P41</sup> +Rh4>norpA rescue (n = 6 from 6 flies), P = 1<br>HO+norpA <sup>P41</sup> (n = 5 from 5 flies) vs. HO+norpA <sup>P41</sup> +Rh5>norpA rescue (n = 6 from 6 flies), P = 0.0080<br>HO+norpA <sup>P41</sup> (n = 5 from 5 flies) vs. HO+norpA <sup>P41</sup> +Rh6>norpA rescue (n = 6 from 6 flies), P = 0.0028 |         |                                                                                                                                                                                                  |
|               |                                         | 1-LNv                 | HO (n = 11 from 7 flies) vs. HO+ninaE <sup>117</sup> (n = 7 from 5 flies), P = 1<br>HO (n = 11 from 7 flies) vs. HO+Rh5 <sup>2</sup> (n = 7 from 5 flies), P = 0.8486<br>HO (n = 11 from 7 flies) vs. HO+Rh6 <sup>1</sup> (n = 7 from 6 flies), P = 0.0117<br>HO (n = 11 from 7 flies) vs. HO+ Rh5 <sup>2</sup> + Rh6 <sup>1</sup> (n = 8 from 7 flies), P = 1.9042E-5                                                                                                                                                                                                                                                                   |         |                                                                                                                                                                                                  |
|               |                                         | s-LNv                 | HO (n = 8 from 5 flies) vs. HO+ninaE <sup>117</sup> (n = 8 from 5 flies), P = 1<br>HO (n = 8 from 5 flies) vs. HO+Rh5 <sup>2</sup> (n = 7 from 5 flies), P = 1<br>HO (n = 8 from 5 flies) vs. HO+Rh6 <sup>1</sup> (n = 6 from 5 flies), P = 1<br>HO (n = 8 from 5 flies) vs. HO+ Rh5 <sup>2</sup> + Rh6 <sup>1</sup> (n = 7 from 7 flies), P = 0.0075                                                                                                                                                                                                                                                                                    |         |                                                                                                                                                                                                  |
|               |                                         | ITP-LNd               | HO (n = 7 from 6 flies) vs. HO+ninaE <sup>117</sup> (n = 6 from 6 flies), P = 0.9665<br>HO (n = 7 from 6 flies) vs. HO+Rh5 <sup>2</sup> (n = 8 from 7 flies), P = 0.0064<br>HO (n = 7 from 6 flies) vs. HO+Rh6 <sup>1</sup> (n = 8 from 6 flies), P = 0.0130<br>HO (n = 7 from 6 flies) vs. HO+ Rh5 <sup>2</sup> + Rh6 <sup>1</sup> (n = 7 from 7 flies), P = 0.0002                                                                                                                                                                                                                                                                     |         |                                                                                                                                                                                                  |
|               |                                         | 5 <sup>th</sup> s-LNv | HO (n = 8 from 7 flies) vs. HO+ninaE <sup>117</sup> (n = 7 from 6 flies), P = 0.8332<br>HO (n = 8 from 7 flies) vs. HO+Rh5 <sup>2</sup> (n = 8 from 8 flies), P = 0.2061<br>HO (n = 8 from 7 flies) vs. HO+Rh6 <sup>1</sup> (n = 8 from 8 flies), P = 0.0364<br>HO (n = 8 from 7 flies) vs. HO+ Rh5 <sup>2</sup> + Rh6 <sup>1</sup> (n = 7 from 7 flies), P = 3.9085E-8                                                                                                                                                                                                                                                                  |         |                                                                                                                                                                                                  |
|               |                                         | Fig. 1e               | Two-tailed Mann-Whitney test                                                                                                                                                                                                                                                                                                                                                                                                                                                                                                                                                                                                             | 1-LNv   | Rh5>norpA rescue (n = 9 from 6 flies) vs. Rh5>norpA rescue+HO (n = 6 from 6 flies), P = 0.7529<br>Rh6>norpA rescue (n = 9 from 6 flies) vs. Rh6>norpA rescue+HO (n = 6 from 6 flies), P = 0.0875 |
|               |                                         |                       |                                                                                                                                                                                                                                                                                                                                                                                                                                                                                                                                                                                                                                          | s-LNv   | Rh5>norpA rescue (n = 6 from 6 flies) vs. Rh5>norpA rescue+HO (n = 5 from 5 flies), P = 0.8923<br>Rh6>norpA rescue (n = 6 from 6 flies) vs. Rh6>norpA rescue+HO (n = 6 from 6 flies), P = 0.2979 |
|               |                                         |                       |                                                                                                                                                                                                                                                                                                                                                                                                                                                                                                                                                                                                                                          | ITP-LNd | Rh5>norpA rescue (n = 6 from 6 flies) vs. Rh5>norpA rescue+HO (n = 7 from 6 flies), P = 0.7210                                                                                                   |

|         |                                                 |                       |                                                                                                        |
|---------|-------------------------------------------------|-----------------------|--------------------------------------------------------------------------------------------------------|
|         |                                                 |                       | Rh6>norpA rescue (n = 6 from 6 flies) vs. Rh6>norpA rescue+HO (n = 6 from 6 flies), P = 0.9383         |
|         |                                                 | 5 <sup>th</sup> s-LNv | Rh5>norpA rescue (n = 11 from 8 flies) vs. Rh5>norpA rescue+HO (n = 8 from 6 flies), P = 0.8365        |
|         |                                                 |                       | Rh6>norpA rescue (n = 7 from 6 flies) vs. Rh6>norpA rescue+HO (n = 6 from 6 flies), P = 0.7594         |
| Fig. 2a |                                                 | ChAT+ R8s             | Similar results were observed in 6 out of 6 flies.                                                     |
| Fig. 2b |                                                 | ChAT+ yR8s            | Similar results were observed in 5 out of 5 flies.                                                     |
|         |                                                 | ChAT+ pR8s            | Similar results were observed in 5 out of 5 flies.                                                     |
| Fig. 2c |                                                 | VAcHT+ yR8s           | Similar results were observed in 7 out of 7 flies.                                                     |
|         |                                                 | VAcHT+ pR8s           | Similar results were observed in 6 out of 6 flies.                                                     |
| Fig. 2d |                                                 | ChAT+ LOVIT+ yR8s     | Similar results were observed in 6 out of 6 flies.                                                     |
|         |                                                 | ChAT+ LOVIT+ pR8s     | Similar results were observed in 9 out of 9 flies.                                                     |
| Fig. 3e | one-way ANOVA followed by Tukey's post hoc test | AMA neurons           | WT (n = 15 from 10 flies) vs. Rh5 <sup>2</sup> ; Rh6 <sup>1</sup> (n = 10 from 6 flies), P = 3.1849E-8 |
|         |                                                 |                       | WT (n = 15 from 10 flies) vs. R8>norpA rescue (n = 7 from 6 flies), P = 0.9997                         |
|         |                                                 |                       | WT (n = 15 from 10 flies) vs. HisC11 <sup>134</sup> ,ort <sup>1</sup> (n = 6 from 5 flies), P = 0.0775 |
|         |                                                 |                       | WT (n = 15 from 10 flies) vs. CIM (n = 7 from 7 flies), P = 0.9679                                     |
|         |                                                 |                       | WT (n = 15 from 10 flies) vs. Hdc <sup>JK910</sup> (n = 6 from 5 flies), P = 0.1768                    |
|         |                                                 |                       | WT (n = 15 from 10 flies) vs. HisC11 <sup>134</sup> ,ort <sup>1</sup> (n = 6 from 5 flies), P = 0.1015 |
|         |                                                 |                       | WT (n = 15 from 10 flies) vs. MCA (n = 11 from 10 flies), P = 2.8524E-8                                |
|         |                                                 |                       | WT (n = 15 from 10 flies) vs. ChAT CKO (n = 11 from 6 flies), P = 3.8396E-8                            |
|         |                                                 |                       | WT (n = 15 from 10 flies) vs. VAcHT CKO (n = 7 from 6 flies), P = 2.8524E-8                            |
| Fig. 3f | one-way ANOVA followed by Tukey's post hoc test | Tm20                  | WT (n = 10 from 9 flies) vs. R8>norpA rescue (n = 5 from 5 flies), P = 0.0163                          |
|         |                                                 |                       | WT (n = 10 from 9 flies) vs. R8>norpA rescue+HO (n = 10 from 8 flies), P = 0                           |
|         |                                                 |                       | WT (n = 10 from 9 flies) vs. R8>norpA rescue+HO+MCA (n = 5 from 5 flies), P = 7.7304E-7                |
|         |                                                 |                       | R8>norpA rescue (n = 5 from 5 flies) vs. R8>norpA rescue+HO (n = 10 from 8 flies), P = 2.8556E-7       |
|         |                                                 |                       | R8>norpA rescue (n = 5 from 5 flies) vs. R8>norpA rescue+HO+MCA (n = 5 from 5 flies), P = 2.2327E-5    |
|         |                                                 |                       | R8>norpA+HO rescue (n = 10 from 8 flies) vs. R8>norpA rescue+HO+MCA (n = 5 from 5 flies), P = 0.0058   |
|         |                                                 | L1                    | WT (n = 9 from 8 flies) vs. R8>norpA rescue (n = 5 from 5 flies), P = 0.0002                           |
|         |                                                 |                       | WT (n = 9 from 8 flies) vs. R8>norpA rescue+HO (n = 10 from 9 flies), P = 1.9808E-7                    |
|         |                                                 |                       | WT (n = 9 from 8 flies) vs. R8>norpA rescue+HO+MCA (n = 5 from 5 flies), P = 4.3755E-8                 |
|         |                                                 |                       | R8>norpA rescue (n = 5 from 5 flies) vs. R8>norpA rescue+HO (n = 10 from 9 flies), P = 0.0003          |
|         |                                                 |                       | R8>norpA rescue (n = 5 from 5 flies) vs. R8>norpA rescue+HO+MCA (n = 5 from 5 flies), P = 0.0126       |
|         |                                                 |                       | R8>norpA+HO rescue (n = 10 from 9 flies) vs. R8>norpA rescue+HO+MCA (n = 5 from 5 flies), P = 0.7130   |

|         |                                                 |                                                                                    |                                                                                                                                                                                                                                                                                                                                                                                                                                                                                                                                                                                                                     |
|---------|-------------------------------------------------|------------------------------------------------------------------------------------|---------------------------------------------------------------------------------------------------------------------------------------------------------------------------------------------------------------------------------------------------------------------------------------------------------------------------------------------------------------------------------------------------------------------------------------------------------------------------------------------------------------------------------------------------------------------------------------------------------------------|
|         |                                                 | Tm9                                                                                | <p>WT (n = 6 from 6 flies) vs. R8&gt;norpA rescue (n = 6 from 6 flies), P = 1.7871E-8</p> <p>WT (n = 6 from 6 flies) vs. R8&gt;norpA rescue+HO (n = 6 from 6 flies), P = 0</p> <p>WT (n = 6 from 6 flies) vs. R8&gt;norpA rescue+HO+MCA (n = 6 from 6 flies), P = 0</p> <p>R8&gt;norpA rescue (n = 6 from 6 flies) vs. R8&gt;norpA rescue+HO (n = 6 from 6 flies), P = 8.0605E-6</p> <p>R8&gt;norpA rescue (n = 6 from 6 flies) vs. R8&gt;norpA rescue+HO+MCA (n = 6 from 6 flies), P = 0.0001</p> <p>R8&gt;norpA+HO rescue (n = 6 from 6 flies) vs. R8&gt;norpA rescue+HO+MCA (n = 6 from 6 flies), P = 0.4202</p> |
| Fig. 3h | one-way ANOVA followed by Tukey's post hoc test | AMA neurons                                                                        | <p>Depolarization after application of CIM (n = 6 from 6 flies)</p> <p>hyperpolarization after application of MCA (n = 6 from 6 flies)</p> <p>no response after application of both CIM and MCA (n = 6 from 6 flies).</p> <p>CIM vs. MCA, P = 0</p> <p>CIM vs. CIM+MCA, P = 1.4796E-6</p> <p>MCA vs. CIM+MCA, P = 8.5592E-5</p>                                                                                                                                                                                                                                                                                     |
| Fig. 4b | two-tailed paired Student's t-tests             | AMA-driven EPSCs in clock neurons before and after MCA application                 | <p>5<sup>th</sup> s-LNv, before vs. after (n = 9 from 9 flies), P = 9.5115E-7</p> <p>ITP-LNd, before vs. after (n = 7 from 7 flies), P = 1.2697E-5</p> <p>l-LNv, before vs. after (n = 7 from 7 flies), P = 0.0024</p> <p>s-LNv, before vs. after (n = 6 from 6 flies), P = 0.0012</p>                                                                                                                                                                                                                                                                                                                              |
| Fig. 4c |                                                 | Light response of clock neurons after silence AMA neurons in R8>norpA rescue flies | <p>5<sup>th</sup> s-LNv (n = 7 from 7 flies)</p> <p>ITP-LNd (n = 7 from 7 flies)</p> <p>l-LNv (n = 7 from 5 flies)</p> <p>s-LNv (n = 7 from 6 flies)</p>                                                                                                                                                                                                                                                                                                                                                                                                                                                            |
| Fig. 4d |                                                 | Branch numbers of AMA neurons                                                      | <p>Single cell (n = 7 from 6 flies)</p> <p>Overlay (n = 7 from 7 flies)</p>                                                                                                                                                                                                                                                                                                                                                                                                                                                                                                                                         |
| Fig. 4e | two-tailed paired Student's t-tests             | Number of columns innervated by pR8s and yR8s                                      | pR8 vs. yR8 (n = 6 from 6 flies), P = 0.0106                                                                                                                                                                                                                                                                                                                                                                                                                                                                                                                                                                        |
| Fig. 4f | two-tailed paired Student's t-tests             | Pairs of AMA neurons                                                               | <p>WT, depolarization, before vs. after CdCl<sub>2</sub> application (n = 7 from 7 flies), P = 0.0024</p> <p>WT, hyperpolarization, before vs. after CdCl<sub>2</sub> application (n = 7 from 7 flies), P = 0.8987</p> <p>shakB<sup>2</sup>, depolarization, before vs. after MCA application (n = 7 from 7 flies), P = 2.6477E-5</p>                                                                                                                                                                                                                                                                               |
|         | two-tailed unpaired Student's t-tests           | Pairs of AMA neurons                                                               | WT (n = 7 from 7 flies) vs. shakB <sup>2</sup> (n = 7 from 7 flies), depolarization, P = 0.0031                                                                                                                                                                                                                                                                                                                                                                                                                                                                                                                     |
| Fig. 5b | one-way ANOVA followed by Tukey's post hoc test | AMA neurons                                                                        | <p>Peak response under current clamp:</p> <p>WT (n = 8 from 8 flies) vs. CO (n = 7 from 7 flies), P = 0.9376</p> <p>WT (n = 8 from 8 flies) vs. CHO (n = 10 from 10 flies), P = 0.3570</p> <p>CO (n = 7 from 7 flies) vs. CHO (n = 10 from 10 flies), P = 0.5906</p>                                                                                                                                                                                                                                                                                                                                                |
|         |                                                 |                                                                                    | <p>Steady response under current clamp:</p> <p>WT (n = 8 from 8 flies) vs. CO (n = 7 from 7 flies), P = 0.0971</p> <p>WT (n = 8 from 8 flies) vs. CHO (n = 10 from 10 flies), P = 0</p> <p>CO (n = 7 from 7 flies) vs. CHO (n = 10 from 10 flies), P = 0</p> <p>Spike firing rate under current clamp:</p> <p>WT (n = 8 from 8 flies)</p> <p>CO (n = 7 from 7 flies)</p> <p>CHO (n = 10 from 10 flies)</p> <p>Peak response under voltage clamp:</p>                                                                                                                                                                |

|                  |                                                 |                       |                                                                                                                                                                                                                                                                                                                                                                                                                                                                                                                                                                                                                                                     |
|------------------|-------------------------------------------------|-----------------------|-----------------------------------------------------------------------------------------------------------------------------------------------------------------------------------------------------------------------------------------------------------------------------------------------------------------------------------------------------------------------------------------------------------------------------------------------------------------------------------------------------------------------------------------------------------------------------------------------------------------------------------------------------|
|                  |                                                 |                       | <p>WT (n = 8 from 8 flies) vs. CO (n = 8 from 8 flies), P = 0.9487<br/> WT (n = 8 from 8 flies) vs. CHO (n = 8 from 8 flies), P = 0.0008<br/> CO (n = 8 from 8 flies) vs. CHO (n = 8 from 8 flies), P = 0.0017</p> <p>Steady response under voltage clamp:<br/> WT (n = 8 from 8 flies) vs. CO (n = 8 from 8 flies), P = 0.3380<br/> WT (n = 8 from 8 flies) vs. CHO (n = 8 from 8 flies), P = 0<br/> CO (n = 8 from 8 flies) vs. CHO (n = 8 from 8 flies), P = 0</p>                                                                                                                                                                               |
| Fig. 5c          | two-tailed unpaired Student's t-tests           | AMA neurons           | <p>Peak response under current clamp:<br/> CHO (n = 5 from 5 flies) vs. R8&gt;HisC11 rescue+CHO (n = 5 from 5 flies), P = 0.5563</p> <p>Steady response under current clamp:<br/> CHO (n = 5 from 5 flies) vs. R8&gt;HisC11 rescue (n = 6 from 6 flies), P = 0.0187</p> <p>Peak response under voltage clamp:<br/> CHO (n = 8 from 8 flies) vs. R8&gt;HisC11 rescue (n = 5 from 5 flies), P = 0.0009</p> <p>Steady response under voltage clamp:<br/> CHO (n = 8 from 8 flies) vs. R8&gt;HisC11 rescue (n = 5 from 5 flies), P = 0.0044</p> <p>Spike firing rate:<br/> CHO (n = 10 from 10 flies)<br/> R8&gt;HisC11 rescue (n = 5 from 5 flies)</p> |
| Fig. 5d          | two-tailed unpaired Student's t-tests           | AMA neurons           | <p>Peak response:<br/> AMA&gt;ort (n = 5 from 5 flies) vs. AMA&gt;ort+HO (n = 5 from 5 flies), P = 0.5552</p> <p>Steady response:<br/> AMA&gt;ort (n = 5 from 5 flies) vs. AMA&gt;ort+HO (n = 5 from 5 flies), P = 0.0044</p> <p>Steady/Peak Ratio:<br/> AMA&gt;ort (n = 5 from 5 flies) vs. AMA&gt;ort+HO (n = 5 from 5 flies), P = 0.0003</p>                                                                                                                                                                                                                                                                                                     |
| Fig. 5e          | one-way ANOVA followed by Tukey's post hoc test | AMA neurons           | <p>ACh response before, during and after light stimuli (n = 6 from 6 flies):<br/> Before vs. during, P = 0.9986<br/> During vs. after, P = 0.9584<br/> Before vs. after, P = 0.9720</p>                                                                                                                                                                                                                                                                                                                                                                                                                                                             |
| Fig. 5f          |                                                 | AMA neurons           | <p>Normalized response of AMA neurons:<br/> WT (n = 5 from 5 flies)<br/> HO (n = 5 from 5 flies)</p>                                                                                                                                                                                                                                                                                                                                                                                                                                                                                                                                                |
| Extended Fig. 1a | one-way ANOVA followed by Tukey's post hoc test | ILNv                  | <p>HO (n = 11 from 7 flies) vs. CHO (n = 6 from 4 flies), P = 0.7261<br/> HO (n = 11 from 7 flies) vs. norpA<sup>P41</sup> (n = 4 from 4 flies), P = 2.1406E-5<br/> CHO (n = 6 from 4 flies) vs. norpA<sup>P41</sup> (n = 4 from 4 flies), P = 0.0004</p>                                                                                                                                                                                                                                                                                                                                                                                           |
|                  |                                                 | sLNv                  | <p>HO (n = 8 from 5 flies) vs. CHO (n = 6 from 5 flies), P = 0.9824<br/> HO (n = 8 from 5 flies) vs. norpA<sup>P41</sup> (n = 6 from 5 flies), P = 0.0369<br/> CHO (n = 6 from 5 flies) vs. norpA<sup>P41</sup> (n = 6 from 5 flies), P = 0.0375</p>                                                                                                                                                                                                                                                                                                                                                                                                |
|                  |                                                 | 5 <sup>th</sup> s-LNv | <p>HO (n = 8 from 7 flies) vs. CHO (n = 7 from 7 flies), P = 0.8312<br/> HO (n = 8 from 7 flies) vs. norpA<sup>P41</sup> (n = 5 from 5 flies), P = 4.6691E-6<br/> CHO (n = 7 from 7 flies) vs. norpA<sup>P41</sup> (n = 5 from 5 flies), P = 2.0277E-5</p>                                                                                                                                                                                                                                                                                                                                                                                          |
|                  |                                                 | ITP-LNd               | <p>HO (n = 7 from 6 flies) vs. CHO (n = 7 from 7 flies), P = 0.7084</p>                                                                                                                                                                                                                                                                                                                                                                                                                                                                                                                                                                             |

|                  |                                     |                                                                                                                                                                                                                                                                                                                                                                                           |                                                                                                                                                                                                                                                                                                                                                                                                  |
|------------------|-------------------------------------|-------------------------------------------------------------------------------------------------------------------------------------------------------------------------------------------------------------------------------------------------------------------------------------------------------------------------------------------------------------------------------------------|--------------------------------------------------------------------------------------------------------------------------------------------------------------------------------------------------------------------------------------------------------------------------------------------------------------------------------------------------------------------------------------------------|
|                  |                                     |                                                                                                                                                                                                                                                                                                                                                                                           | HO (n = 7 from 6 flies) vs. norpA <sup>P41</sup> (n = 5 from 5 flies), P = 7.7245E-6<br>CHO (n = 7 from 7 flies) vs. norpA <sup>P41</sup> (n = 5 from 5 flies), P = 1.8913E-6                                                                                                                                                                                                                    |
| Extended Fig. 1c |                                     | probability of H-B existence                                                                                                                                                                                                                                                                                                                                                              | WT:<br>Day1 (n = 12 from 7 flies)<br>Day 3 (n = 10 from 6 flies)<br>Day 7 (n = 13 from 7 flies)<br>Day 14 (n = 11 from 7 flies)<br>Rh6-hid,rpr:<br>Day 1 (n = 12 from 10 flies)<br>Day 3 (n = 11 from 8 flies)<br>Day 7 (n = 12 from 8 flies)<br>Day 14 (n = 10 from 6 flies)                                                                                                                    |
|                  |                                     | Counts of yR8s                                                                                                                                                                                                                                                                                                                                                                            | WT:<br>Day 1 (n = 9 from 9 flies)<br>Day 3 (n = 9 from 9 flies)<br>Day 7 (n = 10 from 9 flies)<br>Day 14 (n = 7 from 7 flies)<br>Rh6-hid,rpr:<br>Day 1 (n = 9 from 8 flies)<br>Day 3 (n = 7 from 7 flies)<br>Day 7 (n = 10 from 8 flies)<br>Day 14 (n = 6 from 6 flies)                                                                                                                          |
| Extended Fig. 1d | two-tailed paired Student's t-tests | Pairs of clock neurons before and after H-B ablation                                                                                                                                                                                                                                                                                                                                      | ILNv, before vs. after (n = 6 from 6 flies), P = 9.3569E-6<br>sLNv, before vs. after (n = 6 from 6 flies), P = 0.0126<br>5 <sup>th</sup> s-LNv, before vs. after (n = 6 from 6 flies), P = 0.0931<br>ITP-LNd, before vs. after (n = 6 from 6 flies), P = 0.7236                                                                                                                                  |
| Extended Fig. 1g | two-tailed paired Student's t-tests | Light response of H-B eyelets and yR8s                                                                                                                                                                                                                                                                                                                                                    | Calcium response of H-B eyelets and yR8s before and after laser-cutting of H-B eyelets.<br>yR8s (n=5 from 5flies): before vs. after laser-cutting, P = 0.1073<br>H-B eyelets (n=5 from 5flies): before vs. after laser-cutting, P = 0.0288                                                                                                                                                       |
| Extended Fig. 1h |                                     | l-LNv                                                                                                                                                                                                                                                                                                                                                                                     | HO (n = 11 from 7 flies) vs. HO+Rh1>TNT (n = 8 from 4 flies), P = 0.9784<br>HO (n = 11 from 7 flies) vs. HO+Rh34>TNT (n = 6 from 6 flies), P = 0.9974<br>HO (n = 11 from 7 flies) vs. HO+Rh5>TNT (n = 7 from 4 flies), P = 0.5179<br>HO (n = 11 from 7 flies) vs. HO+Rh6>TNT (n = 8 from 5 flies), P = 4.3338E-6<br>HO (n = 11 from 7 flies) vs. HO+Rh56>TNT (n = 8 from 5 flies), P = 1.9868E-8 |
|                  |                                     | s-LNv                                                                                                                                                                                                                                                                                                                                                                                     | HO (n = 8 from 5 flies) vs. HO+Rh1>TNT (n = 8 from 6 flies), P = 0.9997<br>HO (n = 8 from 5 flies) vs. HO+Rh34>TNT (n = 6 from 6 flies), P = 0.9947<br>HO (n = 8 from 5 flies) vs. HO+Rh5>TNT (n = 7 from 6 flies), P = 0.2097<br>HO (n = 8 from 5 flies) vs. HO+Rh6>TNT (n = 6 from 5 flies), P = 0.1762<br>HO (n = 8 from 5 flies) vs. HO+Rh56>TNT (n = 7 from 6 flies), P = 0.0049            |
|                  | ITP-LNd                             | HO (n = 7 from 6 flies) vs. HO+Rh1>TNT (n = 7 from 6 flies), P = 0.9701<br>HO (n = 8 from 5 flies) vs. HO+Rh34>TNT (n = 6 from 6 flies), P = 0.9911<br>HO (n = 8 from 5 flies) vs. HO+Rh5>TNT (n = 9 from 7 flies), P = 0.0238<br>HO (n = 8 from 5 flies) vs. HO+Rh6>TNT (n = 10 from 8 flies), P = 0.0018<br>HO (n = 8 from 5 flies) vs. HO+Rh56>TNT (n = 6 from 6 flies), P = 5.8113E-7 |                                                                                                                                                                                                                                                                                                                                                                                                  |
|                  | 5 <sup>th</sup> s-LNv               | HO (n = 8 from 7 flies) vs. HO+Rh1>TNT (n = 7 from 6 flies), P = 0.9398                                                                                                                                                                                                                                                                                                                   |                                                                                                                                                                                                                                                                                                                                                                                                  |



|                  |                                          |                                                                                                                                                                                                                                                                                                                |
|------------------|------------------------------------------|----------------------------------------------------------------------------------------------------------------------------------------------------------------------------------------------------------------------------------------------------------------------------------------------------------------|
|                  |                                          | HO (n = 8 from 7 flies) vs. HO+Rh34>TNT (n = 6 from 6 flies), P = 0.9998<br>HO (n = 8 from 7 flies) vs. HO+Rh5>TNT (n = 8 from 7 flies), P = 0.0645<br>HO (n = 8 from 7 flies) vs. HO+Rh6>TNT (n = 10 from 9 flies), P = 0.0137<br>HO (n = 8 from 7 flies) vs. HO+Rh56>TNT (n = 6 from 6 flies), P = 2.1670E-7 |
| Extended Fig. 2a | LOVIT+ PRs                               | Similar results were observed in 5 out of 5 flies.                                                                                                                                                                                                                                                             |
|                  | Hdc+ PRs                                 | Similar results were observed in 3 out of 3 flies.                                                                                                                                                                                                                                                             |
| Extended Fig. 2b | LOVIT+ R8s                               | Similar results were observed in 6 out of 6 flies.                                                                                                                                                                                                                                                             |
|                  | Hdc+ R8s                                 | Similar results were observed in 4 out of 4 flies.                                                                                                                                                                                                                                                             |
| Extended Fig. 2c | Rh1 intersection                         | Rh1&ChAT: similar results were observed in 4 out of 4 flies.<br>Rh1&vGlut: similar results were observed in 3 out of 3 flies.<br>Rh1&TH: similar results were observed in 3 out of 3 flies.<br>Rh1&vGAT: similar results were observed in 4 out of 4 flies.                                                    |
|                  | Rh3 intersection                         | Rh3&ChAT: similar results were observed in 4 out of 4 flies.<br>Rh3&vGlut: similar results were observed in 4 out of 4 flies.<br>Rh3&TH: similar results were observed in 3 out of 3 flies.<br>Rh3&vGAT: similar results were observed in 4 out of 4 flies.                                                    |
|                  | Rh4 intersection                         | Rh4&ChAT: similar results were observed in 3 out of 3 flies.<br>Rh4&vGlut: similar results were observed in 3 out of 3 flies.<br>Rh4&TH: similar results were observed in 3 out of 3 flies.<br>Rh4&vGAT: similar results were observed in 4 out of 4 flies.                                                    |
| Extended Fig. 2d | R8 intersection                          | R8(Rh5+Rh6)&vGlut: similar results were observed in 3 out of 3 flies.<br>R8&TH: similar results were observed in 3 out of 3 flies.<br>R8&Trh: similar results were observed in 3 out of 3 flies.<br>R8&vGAT: similar results were observed in 4 out of 4 flies.                                                |
| Extended Fig. 4a | postsynaptic target of pR8s              | similar results were observed in 11 out of 11 flies.                                                                                                                                                                                                                                                           |
|                  | postsynaptic target of yR8s              | similar results were observed in 19 out of 19 flies.                                                                                                                                                                                                                                                           |
| Extended Fig. 4b | Non-ort target of pR8s                   | similar results were observed in 6 out of 6 flies.                                                                                                                                                                                                                                                             |
|                  | Non-ort target of yR8s                   | similar results were observed in 7 out of 7 flies.                                                                                                                                                                                                                                                             |
| Extended Fig. 4c | Sparse labelling of AMA neurons          | Similar single AMA neurons were labeled in 8 out of 37 flies.                                                                                                                                                                                                                                                  |
| Extended Fig. 4d | Neurobiotin-labelling of AMA neurons     | Similar results were observed in 11 out of 11 flies.                                                                                                                                                                                                                                                           |
| Extended Fig. 4e | Colocalization of PRs and AMA neurons    | Similar results were observed in 8 out of 8 samples that single AMA neurons were successfully labeled.                                                                                                                                                                                                         |
| Extended Fig. 4f | Colocalization of pR8s and AMA neurons   | Similar results were observed in 6 out of 6 flies.                                                                                                                                                                                                                                                             |
|                  | Colocalization of yR8s and AMA neurons   | Similar results were observed in 5 out of 5 flies.                                                                                                                                                                                                                                                             |
| Extended Fig. 5b |                                          | Photo-activated: n = 10 from 10 flies<br>No photo-activation: n=7 from 7 flies                                                                                                                                                                                                                                 |
| Extended Fig. 5c | Colocalization of AMA and aMe 12 neurons | Similar results were observed in 8 out of 8 flies.                                                                                                                                                                                                                                                             |
| Extended Fig. 5d | Ort+ target of pR8s                      | Similar results were observed in 6 out of 6 flies.                                                                                                                                                                                                                                                             |
|                  | Ort+ target of yR8s                      | Similar results were observed in 7 out of 7 flies.                                                                                                                                                                                                                                                             |
| Extended Fig. 5e | Ort expression of L/Tm neurons           | L1: Similar results were observed in 3 out of 3 flies.<br>Tm5: Similar results were observed in 4 out of 4 flies.<br>Tm9: Similar results were observed in 7 out of 7 flies.<br>Tm20: Similar results were observed in 4 out of 4 flies.                                                                       |

|                    |                                                 |                                                  |                                                                                                                                                                                                                                                          |
|--------------------|-------------------------------------------------|--------------------------------------------------|----------------------------------------------------------------------------------------------------------------------------------------------------------------------------------------------------------------------------------------------------------|
| Extended Fig. 5f   |                                                 | GRASP between yR8s and L/Tm neurons              | Rh6&L1: Similar results were observed in 3 out of 3 flies.<br>Rh6&Tm5: Similar results were observed in 3 out of 3 flies.<br>Rh6&Tm9: Similar results were observed in 4 out of 4 flies.<br>Rh6&Tm20: Similar results were observed in 3 out of 3 flies. |
| Extended Fig. 6a   | two-tailed paired Student's t-tests             | Light response of AMA neurons                    | norpA <sup>P41</sup> (n=7 from 7 flies) vs. R8>norpA rescue (n = 7 from 7 flies), P = 5.8591E-6                                                                                                                                                          |
| Extended Fig. 6b   | one-way ANOVA followed by Tukey's post hoc test | L1                                               | R8>norpA rescue (n = 5 from 5 flies) vs. CIM (n = 10 from 8 flies), P = 0<br>R8>norpA rescue (n = 6 from 6 flies) vs. CIM+MCA (n = 5 from 5 flies), P = 2.9141E-6<br>CIM (n = 10 from 8 flies) vs. CIM+MCA (n = 5 from 5 flies), P = 0.0361              |
|                    |                                                 | Tm9                                              | R8>norpA rescue (n = 6 from 6 flies) vs. CIM (n = 5 from 5 flies), P = 0<br>R8>norpA rescue (n = 6 from 6 flies) vs. CIM+MCA (n = 6 from 6 flies), P = 0<br>CIM (n = 5 from 5 flies) vs. CIM+MCA (n = 6 from 6 flies), P = 0.0311                        |
|                    |                                                 | Tm20                                             | R8>norpA rescue (n = 5 from 5 flies) vs. CIM (n = 10 from 7 flies), P = 0<br>R8>norpA rescue (n = 5 from 5 flies) vs. CIM+MCA (n = 5 from 5 flies), P = 1.5230E-5<br>CIM (n = 10 from 7 flies) vs. CIM+MCA (n = 5 from 5 flies), P = 0.0062              |
| Extended Fig. 6c   | one-way ANOVA followed by Tukey's post hoc test | L1                                               | n = 6 from 6 flies<br>Before vs. during CIM, P = 0<br>Before vs. after CIM, P = 0.4635<br>During vs. after CIM, P = 0                                                                                                                                    |
|                    |                                                 | Tm9                                              | n = 6 from 6 flies<br>Before vs. during CIM, P = 2.5508E-7<br>Before vs. after CIM, P = 0.8700<br>During vs. after CIM, P = 5.7548E-7                                                                                                                    |
|                    |                                                 | Tm20                                             | n = 6 from 6 flies<br>Before vs. during CIM, P = 2.3678E-7<br>Before vs. after CIM, P = 0.5633<br>During vs. after CIM, P = 1.2360E-6                                                                                                                    |
| Extended Fig. 6e   |                                                 | GRASP between AMA and L2                         | Similar results were observed in 6 out of 6 flies.                                                                                                                                                                                                       |
| Extended Fig. 6f   |                                                 | p-GRASP between AMA and Tm neurons               | AMA&Tm20: Similar results were observed in 9 out of 9 flies.<br>AMA&Tm9: Similar results were observed in 4 out of 4 flies.                                                                                                                              |
| Extended Fig. 6g   | Two-tailed Mann-Whitney tests                   | AMA neurons                                      | WT (n = 6 from 4 flies) vs. VT>ort (n = 6 from 5 flies), P = 0.0028                                                                                                                                                                                      |
| Extended Fig. 7a&b |                                                 | Colabelling of AMA>Tango, anti-TIM, and anti-PDF | Similar results were observed in 20 out of 20 flies.                                                                                                                                                                                                     |
| Extended Fig. 7c   |                                                 | Colabelling of AMA>Tango and R54D11-LexA         | Similar results were observed in 13 out of 13 flies.                                                                                                                                                                                                     |
| Extended Fig. 7d   | two-tailed paired Student's t-tests             | Pairs of clock neurons                           | ITP-LNd vs. 5 <sup>th</sup> s-LNv (n = 6 from 6 flies), P = 0.0017<br>ITP-LNd vs. l-LNv (n = 7 from 7 flies), P = 0.0104<br>ITP-LNd vs. s-LNv (n = 6 from 6 flies), P = 0.0031                                                                           |
| Extended Fig. 7e   |                                                 |                                                  | l-LNv: n = 7 from 5 flies<br>s-LNv: n = 7 from 5 flies<br>ITP-LNd: n = 7 from 6 flies<br>5 <sup>th</sup> s-LNv: n = 9 from 9 flies                                                                                                                       |

|                  |                                                 |                                 |                                                                                                                                                                                                                                                                                                                                                                                                                                                                                                                                                                                                                                                                                                                                                                                                                                                                                                                                                                                                                                                                                                                                                                                                                                                                                                                                                                                                                                                                                                                                                                 |
|------------------|-------------------------------------------------|---------------------------------|-----------------------------------------------------------------------------------------------------------------------------------------------------------------------------------------------------------------------------------------------------------------------------------------------------------------------------------------------------------------------------------------------------------------------------------------------------------------------------------------------------------------------------------------------------------------------------------------------------------------------------------------------------------------------------------------------------------------------------------------------------------------------------------------------------------------------------------------------------------------------------------------------------------------------------------------------------------------------------------------------------------------------------------------------------------------------------------------------------------------------------------------------------------------------------------------------------------------------------------------------------------------------------------------------------------------------------------------------------------------------------------------------------------------------------------------------------------------------------------------------------------------------------------------------------------------|
| Extended Fig. 8a |                                                 | Connection among AMA neurons    | Neurobiotin-injection in WT: similar results were observed in 11 out of 11 flies.<br>Neurobiotin-injection in <i>shakB</i> <sup>2</sup> : similar results were observed in 3 out of 3 flies.<br>AMA>Tango: similar results were observed in 6 out of 6 flies.                                                                                                                                                                                                                                                                                                                                                                                                                                                                                                                                                                                                                                                                                                                                                                                                                                                                                                                                                                                                                                                                                                                                                                                                                                                                                                   |
| Extended Fig. 8c |                                                 | Calcium response of AMA neurons | n = 6 from 5 flies                                                                                                                                                                                                                                                                                                                                                                                                                                                                                                                                                                                                                                                                                                                                                                                                                                                                                                                                                                                                                                                                                                                                                                                                                                                                                                                                                                                                                                                                                                                                              |
| Extended Fig. 9a | one-way ANOVA followed by Tukey's post hoc test | Light response of AMA neurons   | Depolarization under current clamp<br>WT (n = 6 from 6 flies) vs. CHO (n = 6 from 6 flies), P = 0.1513<br>WT (n = 6 from 6 flies) vs. CO (n = 6 from 6 flies), P = 0.6319<br>CO (n = 6 from 6 flies) vs. CHO (n = 6 from 6 flies), P = 0.6789<br>Inward current under voltage clamp<br>WT (n = 15 from 6 flies) vs. CHO (n = 6 from 6 flies), P = 0.9909<br>WT (n = 15 from 6 flies) vs. CO (n = 6 from 6 flies), P = 0.5688<br>CO (n = 6 from 6 flies) vs. CHO (n = 6 from 6 flies), P = 0.6463                                                                                                                                                                                                                                                                                                                                                                                                                                                                                                                                                                                                                                                                                                                                                                                                                                                                                                                                                                                                                                                                |
| Extended Fig. 9b | one-way ANOVA followed by Tukey's post hoc test | AMA neurons                     | Peak response before, during and after CIM application (n = 6 from 6 flies):<br>Before vs. during: P = 0.7662<br>During vs. after, P = 0.9270<br>Before vs. after, P = 0.5442<br>Steady response before, during and after CIM application (n = 6 from 6 flies):<br>Before vs. during: P = 0<br>During vs. after, P = 0<br>Before vs. after, P = 0.0974                                                                                                                                                                                                                                                                                                                                                                                                                                                                                                                                                                                                                                                                                                                                                                                                                                                                                                                                                                                                                                                                                                                                                                                                          |
| Extended Fig. 9c | one-way ANOVA followed by Tukey's post hoc test | Light response of AMA neurons   | Peak response under current clamp:<br>R8>norpA rescue (n = 6 from 6 flies) vs. R8>norpA rescue; CO (n = 6 from 6 flies), P = 0.3538<br>R8>norpA rescue (n = 6 from 6 flies) vs. R8>norpA rescue; CHO (n = 8 from 6 flies), P = 0.5171<br>R8>norpA rescue;CO (n = 6 from 6 flies) vs. R8>norpA rescue; CHO (n = 8 from 6 flies), P = 0.9726<br>Steady response under current clamp:<br>R8>norpA rescue (n = 6 from 6 flies) vs. R8>norpA rescue; CO (n = 6 from 6 flies), P = 0.7552<br>R8>norpA rescue (n = 6 from 6 flies) vs. R8>norpA rescue; CHO (n = 8 from 6 flies), P = 1.2233E-5.<br>R8>norpA rescue;CO (n = 6 from 6 flies) vs. R8>norpA rescue; CHO (n = 8 from 6 flies), P = 1.4048E-6.<br>Peak response under voltage clamp:<br>R8>norpA rescue (n = 6 from 6 flies) vs. R8>norpA rescue; CO (n = 8 from 6 flies), P = 0.5774<br>R8>norpA rescue (n = 6 from 6 flies) vs. R8>norpA rescue; CHO (n = 8 from 6 flies), P = 0.1858<br>R8>norpA rescue;CO (n = 6 from 6 flies) vs. R8>norpA rescue; CHO (n = 8 from 6 flies), P = 0.0164<br>Steady response under voltage clamp:<br>R8>norpA rescue (n = 6 from 6 flies) vs. R8>norpA rescue; CO (n = 8 from 6 flies), P = 0.1698<br>R8>norpA rescue (n = 6 from 6 flies) vs. R8>norpA rescue; CHO (n = 8 from 6 flies), P = 6.0293E-8.<br>R8>norpA rescue;CO (n = 6 from 6 flies) vs. R8>norpA rescue; CHO (n = 8 from 6 flies), P = 1.2942E-6.<br>Spike firing rate:<br>R8>norpA rescue (n = 5 from 5 flies)<br>R8>norpA rescue; CO (n = 5 from 5 flies)<br>R8>norpA rescue; CHO (n = 6 from 5 flies) |
| Extended Fig. 9e | Two-tailed Mann-                                | Calcium response of R8 terminal | Peak response, WT (n = 59 from 6 flies) vs. CHO (n = 58 from 5 flies), P = 0.0002<br>Steady response, WT (n = 59 from 6 flies) vs. CHO (n = 58 from 5 flies), P = 6.2870E-6                                                                                                                                                                                                                                                                                                                                                                                                                                                                                                                                                                                                                                                                                                                                                                                                                                                                                                                                                                                                                                                                                                                                                                                                                                                                                                                                                                                     |

| Whitney tests     |                                                                                                |                                                                                                                                        |
|-------------------|------------------------------------------------------------------------------------------------|----------------------------------------------------------------------------------------------------------------------------------------|
| Extended Fig. 9f  | Light response of AMA neurons in saline solutions with different Ca <sup>2+</sup> concentratio | Depolarization induced by dim and bright light under different calcium concentration, in the presence of CIM or MCA, n = 6             |
| Extended Fig. 10b |                                                                                                | l-LNv (n = 6 from 5 flies)<br>s-LNv (n = 6 from 6 flies)<br>ITP-LNd (n = 6 from 6 flies)<br>5 <sup>th</sup> s-LNv (n = 6 from 6 flies) |

**Supplementary Table 3 | Fly strains used in this paper**

| Fly Strains                                                | Source                            | Identifier |
|------------------------------------------------------------|-----------------------------------|------------|
| <b>Gal4</b>                                                |                                   |            |
| <i>DvPdf-Gal4 (II)</i>                                     | From P. Emery                     | N/A        |
| <i>GMR-Gal4 (II)</i>                                       | From P. Emery                     | N/A        |
| <i>GMR24C08-Gal4 (attp2)</i>                               | Bloomington Stock Center          | #48050     |
| <i>L1 spGal4: SS00691</i>                                  | From Janelia Research Campus      | N/A        |
| <i>Tm5 spGal4: ort-Gal4.C1a.DBD; dVP16AD[ET18k]</i>        | Bloomington Stock Center          | #56524     |
| <i>Tm9 spGal4: SS00307</i>                                 | From Janelia Research Campus      | N/A        |
| <i>Tm20 spGal4: ort-Gal4.C1a.DBD, ET.VP16.AD [tou9A30]</i> | Bloomington Stock Center          | #56521     |
| <i>Tm20 spGal4: SS00355</i>                                | From Janelia Research Campus      | N/A        |
| <i>aMe12 spGal4: SS01050</i>                               | From Janelia Research Campus      | N/A        |
| <i>HDC-Gal4 (II)</i>                                       | From Y. Rao                       | N/A        |
| <i>Rh1-Gal4 (II)</i>                                       | Bloomington Stock Center          | #8692      |
| <i>Rh3-Gal4 (II)</i>                                       | Bloomington Stock Center          | #7457      |
| <i>Rh4-Gal4 (II)</i>                                       | Bloomington Stock Center          | #8627      |
| <i>Rh5-Gal4 (II)</i>                                       | Bloomington Stock Center          | #7458      |
| <i>Rh6-Gal4 (II)</i>                                       | Bloomington Stock Center          | #7459      |
| <i>Rh6-Gal4 (III)</i>                                      | Bloomington Stock Center          | #7464      |
| <i>VT037867-Gal4 (attp2)</i>                               | Vienna Drosophila Resource Center | #v203797   |
| <b>LexA</b>                                                |                                   |            |
| <i>DvPdf-LexA (attp2)</i>                                  | our own lab                       | N/A        |
| <i>DvPdf-LexA (attp40)</i>                                 | our own lab                       | N/A        |
| <i>GMR27G06-LexA (attp40)</i>                              | Bloomington Stock Center          | #54779     |
| <i>GMR54D11-LexA (attp2)</i>                               | This study                        |            |
| <i>GMR-LexA (II)</i>                                       | From Y. Rao                       | N/A        |
| <i>ort-LexA (III)</i>                                      | From Y. Rao                       | N/A        |
| <i>Rh5-LexA (II)</i>                                       | From Y. Rao                       | N/A        |
| <i>Rh6-LexA (attp40)</i>                                   | From T. Suzuki                    | N/A        |
| <i>vGAT-LexA (II)</i>                                      | From Y. Rao                       | N/A        |
| <i>VT037867-LexA (attp40)</i>                              | our own lab                       | N/A        |
| <b>QS</b>                                                  |                                   |            |
| <i>ort-QS (VK00005)</i>                                    | This paper                        | N/A        |
| <b>FLP</b>                                                 |                                   |            |
| <i>ChAT-FLP (III)</i>                                      | From Y. Rao                       | N/A        |
| <i>TH-FLP (III)</i>                                        | From Y. Rao                       | N/A        |
| <i>Trh-FLP (III)</i>                                       | From Y. Rao                       | N/A        |

|                                                                |                          |        |
|----------------------------------------------------------------|--------------------------|--------|
| <i>vGlut-FLP (II)</i>                                          | From Y. Rao              | N/A    |
| <b>UAS</b>                                                     |                          |        |
| <i>UAS-Cas9.P2 (attp40)</i>                                    | Bloomington Stock Center | #58985 |
| <i>UAS-ChAT sgRNA (attp5)</i>                                  | From Y. Rao              | N/A    |
| <i>UAS-Hdc sgRNA (attp5)</i>                                   | From Y. Rao              | N/A    |
| <i>UAS-VAcHT sgRNA (attp5)</i>                                 | From Y. Rao              | N/A    |
| <i>UAS-mSPA-GFP (III)</i>                                      | From Y. Rao              | N/A    |
| <i>UAS-CsChrimson (attp40)</i>                                 | Bloomington Stock Center | #55135 |
| <i>UAS-FRT-STOP-FRT-mCD8-GFP (II)</i>                          | From C. Potter           | N/A    |
| <i>UAS-FRT-STOP-FRT-mCD8-GFP (III)</i>                         | From C. Potter           | N/A    |
| <i>UAS-GCaMP6m (attp40)</i>                                    | Bloomington Stock Center | #42748 |
| <i>UAS-GCaMP6m (VK00005)</i>                                   | Bloomington Stock Center | #42750 |
| <i>UAS-FLP(II)</i>                                             | Bloomington Stock Center | #4539  |
| <i>UAS-mCD8-GFP (II)</i>                                       | From C. Potter           | N/A    |
| <i>UAS-mCD8-GFP (III)</i>                                      | From C. Potter           | N/A    |
| <i>UAS-norpA.K (II)</i>                                        | Bloomington Stock Center | #26267 |
| <i>UAS-norpA.K (III)</i>                                       | Bloomington Stock Center | #26273 |
| <i>UAS-HisCl1(II)</i>                                          | From F. Rouyer           | N/A    |
| <i>UAS-ort (II)</i>                                            | From F. Rouyer           | N/A    |
| <i>UAS-post-GFP<sup>1-10</sup> (attp2)</i>                     | From S. Stowers          | N/A    |
| <i>UAS-TNTE (II)</i>                                           | Bloomington Stock Center | #28837 |
| <b>LexAop</b>                                                  |                          |        |
| <i>LexAop2-GCaMP6f (attp5)</i>                                 | Bloomington Stock Center | #44277 |
| <i>LexAop2-jGCaMP7s</i>                                        | Bloomington Stock Center | #80913 |
| <i>LexAop2-GCaMP6m (VK00005)</i>                               | Bloomington Stock Center | #44276 |
| <i>LexAop-tdTomato (attp5)</i>                                 | From Y. Rao              | N/A    |
| <i>LexAop-norpA (attp5)</i>                                    | From Y. Rao              | N/A    |
| <i>LexAop-post-GFP<sup>11</sup> (VK00005)</i>                  | This paper               | N/A    |
| <i>LexAop2-GFP (attp5)</i>                                     | From Y. Rao              | N/A    |
| <i>LexAop2-GFP (attp2)</i>                                     | Bloomington Stock Center | #32209 |
| <b>Mutant</b>                                                  |                          |        |
| <i>cry<sup>02</sup></i>                                        | From T. Yoshii           | N/A    |
| <i>cry<sup>02</sup>, HisCl1<sup>134</sup>, ort<sup>1</sup></i> | From F. Rouyer           | N/A    |
| <i>Hdc<sup>JK910</sup></i>                                     | Bloomington Stock Center | #64203 |
| <i>ort<sup>1</sup></i>                                         | From Y. Rao              | N/A    |
| <i>HisCl1<sup>134</sup>, ort<sup>1</sup></i>                   | From Y. Rao              | N/A    |

|                                                                                                                                                                                                                |                          |         |
|----------------------------------------------------------------------------------------------------------------------------------------------------------------------------------------------------------------|--------------------------|---------|
| <i>norpA<sup>P41</sup></i>                                                                                                                                                                                     | From P. Emery            | N/A     |
| <i>Rh5<sup>2</sup></i>                                                                                                                                                                                         | From F. Rouyer           | N/A     |
| <i>ninaE<sup>117</sup></i>                                                                                                                                                                                     | Kyoto stock center       | #109599 |
| <i>Rh6<sup>1</sup></i>                                                                                                                                                                                         | Kyoto stock center       | #109600 |
| <i>Rh6<sup>1</sup>, HisCl<sup>134</sup>, ort<sup>1</sup></i>                                                                                                                                                   | From F. Rouyer           | N/A     |
| <i>shakB<sup>2</sup></i>                                                                                                                                                                                       | From J.M. Blagburn       | N/A     |
| <b>Others</b>                                                                                                                                                                                                  |                          |         |
| <i>MCFO-1:</i>                                                                                                                                                                                                 |                          |         |
| <i>pBPhsFlp2::PEST (attP3); pJFRC201-10XUAS-FRT-STOP-FRT-myr::smGFP-HA (VK0005), pJFRC240-10XUAS-FRT-STOP-FRT-myr::smGFP-V5-THS-10XUAS-FRT-STOP-FRT-myr::smGFP-FLAG (su(Hw)attP1)hsFLP(attP3);; HA_V5_FLAG</i> | Bloomington Stock Center | #64085  |
| <i>BACTrace:</i>                                                                                                                                                                                               |                          |         |
| <i>LexAop2-Syb::GFP-P10 (VK37) LexAop-QF2::SNAP25::HIVNES::Syntaxin (VK18); UAS-B3Recombinase (attP2) UAS&lt;B3STOP&lt;BoNT/A (VK5) UAS&lt;B3STOP&lt;BoNT/A(VK27) QUAS-mtdTomato::HA</i>                       | From G. Jefferis         | N/A     |
| <i>GRASP:</i>                                                                                                                                                                                                  |                          |         |
| <i>UAS-GFP<sup>1-10</sup>, LexAop-GFP<sup>11</sup></i>                                                                                                                                                         | From Y. Rao              | N/A     |
| <i>trans-Tango:</i>                                                                                                                                                                                            |                          |         |
| <i>UAS-myrGFP.QUAS-mtdTomato-3×HA(attp8); trans-Tango (attp40)</i>                                                                                                                                             | Bloomington Stock Center | #77124  |
| <i>UAS-FRT-STOP-FRT-CsChrimson, LexAop-FLP (II)</i>                                                                                                                                                            | From C. Zhou             | N/A     |
| <i>UAS-FRT-STOP-FRT-CsChrimson, LexAop-FLP (III)</i>                                                                                                                                                           | From C. Zhou             | N/A     |
| <i>VACHT-FRT-STOP-FRT-HA (III)</i>                                                                                                                                                                             | Bloomington Stock Center | #76021  |
| <i>GMR-RFP (II)</i>                                                                                                                                                                                            | From Y. Rao              | N/A     |
| <i>Rh5-eGFP (II)</i>                                                                                                                                                                                           | Bloomington Stock Center | #8600   |
| <i>Rh6-eGFP (II)</i>                                                                                                                                                                                           | Bloomington Stock Center | #7461   |
| <i>LexAop-GFP, UAS-RFP (I)</i>                                                                                                                                                                                 | From C. Liu              | N/A     |
| <i>Rh6-hid,rpr (attp5)</i>                                                                                                                                                                                     | This paper               | N/A     |
